# Supplementary material
Source: PubMed Central journal article supplement (PMC2937995)

## SUPPLEMENTAL MATERIAL FOR:

### ANALYSIS OF MUTUALLY-EXCLUSIVE ALTERNATIVELY SPLICED SERPIN-1 ISOFORMS IN *MANDUCA SEXTA* HEMOLYMPH AND IDENTIFICATION OF SERPIN-1 PROTEINASE COMPLEXES FORMED *IN VIVO*

Emily J. Ragan, Chunju An, Celeste T. Yang, and Michael R. Kanost

From the Department of Biochemistry

Kansas State University Manhattan, Kansas 66506

Address correspondence to: Michael Kanost, 141 Chalmers Hall, Manhattan, KS, 66506. Tel: 785-532-6964; Fax: 785-532-7278; Email: kanost@ksu.edu.

## SUPPLEMENTAL FIGURE LEGENDS

### **Fig. S1. Comparison of serpin-1 isoform expression in control and bacteria injected fat body.**

Relative mRNA levels of individual serpin-1 isoforms from naïve and *M. luteus* injected fat body samples were compared by t-tests with the Welch correction for variance. Error bars show standard error of the mean (SEM). Statistically significant differences ( $p$ -value < 0.05) are indicated (\*, *p*-value on graph). Other  $p$ -values are >0.05. No significant differences were seen in hemocyte samples (data not shown).

### **Fig. S2. *M. sexta* plasma separated by 2D-PAGE**

Whole *M. sexta* plasma (16  $\mu$ l) was separated by IEF with a pH range of 4.7-5.9, followed by SDS-PAGE on a 4-12% acrylamide gel and analysis by silver stain (A) or immunoblot with serpin-1 antiserum (B).

### **Fig. S3. 2D-PAGE spots selected for protease digestion.**

As in Fig. 3, *M. sexta* plasma proteins were immunoaffinity purified using serpin-1 antisera bound to protein A beads. The concentrated serpin-1 elution fractions were then separated by 2D-PAGE, pH range 4.7-5.9, and the gels stained with Coomassie blue. A) Spots excised for protease digestion using GluC in either bicarbonate buffer (*spot number followed by b*) or phosphate buffer (*spot number followed by u*) and subsequent analysis by MALDI-TOF/TOF. B) The indicated spots were analyzed by MALDI-TOF/TOF after double digestion with LysC and AspN proteases (*spot number followed by a*).

### **Fig S4. MALDI-TOF/TOF spectra from X!Tandem**

Here we provide the MALDI-TOF/TOF spectra as represented in X!Tandem for serpin-1 isoform specific peptides or protease peptides which were found in putative serpin-1-protease complexes. Mascot ion scores and X! Tandem peptide identification probabilities are listed in Supplemental Table 2.

### **Fig S5. Immunoblot detection of serpin-1B and serpin-1F in spot 5.**

2D-immunoblots of *M. sexta* plasma proteins immunoaffinity purified with serpin-1 antisera (as in Fig. 3) were probed with antisera raised against serpin-1B peptide (A) or serpin-1F peptide (B).

### **Fig. S6. MALDI-TOF spectra from trypsin digested spots 13 and 14.**

Highly similar MALDI-TOF spectra were produced following trypsin digestion of spots 13 (A) and 14 (B) (spot numbering as in Fig. 3B), showing both spots contain serpin-1E. These spectra differ in the mass of one peptide, present in spot 13 at 1592.95 and in spot 14 at 1566.95. The masses of these two peptides matches the prediction for a serpin-1 tryptic peptide from residues XXX to YYY with Tyr371 (spot 13) and His371 (spot 14).

### **Fig S7. MALDI-TOF spectra from bands 1 and 2.**

MALDI-TOF spectra from bands 1 (A) and 2 (B). Peaks corresponding to exons 1-8 of serpin-1 are labeled in blue; MO stands for oxidized methionine. Isoform-specific peaks are labeled in orange and chymotrypsin specific peaks in purple.

Table S1. Primers used for PCR analysis of serpin-1 isoforms

| Location  | Name     | Primer sequence (5' to 3') | Product size (bp) |
|-----------|----------|----------------------------|-------------------|
| Exon 9A   | Spn1A    | CATAACACGACAAGCGAGAC       | 160               |
| Exon 9B   | Spn1B    | TACCGGCGAGTTTGATACTA       | 160               |
| Exon 9C   | Spn1C    | TTCTTCGTATGAACCTGTCG       | 161               |
| Exon 9D   | Spn1D    | AAGTGTACGTCCACCCACTC       | 158               |
| Exon 9E   | Spn1E    | AGTTATACCGCCCGTCCTA        | 155               |
| Exon 9F   | Spn1F    | TTCATCGCTGTCGTAGACTC       | 192               |
| Exon 9G   | Spn1G    | TTGAACCACCTGTTATCGAA       | 153               |
| Exon 9H   | Spn1H    | CGTGGAATCCATAGACAATTT      | 178               |
| Exon 9I   | Spn1I    | TCGGTATAGTTGCGCTATCA       | 179               |
| Exon 9J   | Spn1J    | TGACAGACAGATGTTGTTCTGA     | 177               |
| Exon 9K   | Spn1K    | TTCATTTTCGTGCCAAAAGT       | 150               |
| Exon 9Z   | Spn1Z    | TTGGCATAGCATATCTGTCG       | 167               |
| Exon 10   | Spn1Rev  | ATTCCAACCGGACGTTATT        |                   |
| Exon8-9E  | Spn1Efwd | GGCTGCTAACGTCATTCG         | 147               |
| Exon9E-10 | Spn1Erev | ATCGTTTTATGGTTGGAGA        |                   |
| RPS3      | RPS3Fwd  | TGCGTTTCATCATGGAGT         | 173               |
|           | RPS3Rev  | TCCTTGCCTGAGAAGTAC         |                   |

Table S2. Mass spectrometry identification of spots from 2D gels using immunoaffinity-purified serpin-1.

| Trypsin spot | Protein Name | Accession Number | Iso-form <sup>1</sup> | Results from the whole protein |                     |            |             | Results from Isoform specific peptides |                 |                         |                  |                  |                                |
|--------------|--------------|------------------|-----------------------|--------------------------------|---------------------|------------|-------------|----------------------------------------|-----------------|-------------------------|------------------|------------------|--------------------------------|
|              |              |                  |                       | Mascot Protein Score           | Protein Score C.I.% | Pep. Count | % seq. cov. | Number by PMF (isoform)                | Number by MS/MS | MS/MS Observed mass(es) | Sequence covered | Mascot ion score | X! Tandem peptide ID prob. (%) |
| 2t           | serpin 1     | AAC47340.1       | J                     | 1,080                          | 100                 | 21         | 60          | 2 (J)                                  | 2               | 2422.175                | 337-359          | 173              | 95                             |
|              |              |                  |                       |                                |                     |            |             |                                        |                 | 1870.942                | 382-397          | 38.5             | 95                             |
| 3t           | serpin 1     | AAC47340.1       | ?                     | 894                            | 100                 | 25         | 57          | 1 (J)                                  | 0               | 2422.177                | 337-359          |                  |                                |
| 4t           | serpin 1     | AAC47332.1       | H                     | 1,010                          | 100                 | 21         | 57          | 1 (H)                                  | 1               | 1752.029                | 382-396          | 80               | 95                             |
| 5t           | serpin 1     | AAC47333.1       | ?                     | 1,010                          | 100                 | 19         | 53          | 1 (F)                                  | 0               | 1882.106                | 367-381          |                  |                                |
| 6t           | serpin 1     | AAC47337.1       | I                     | 1,000                          | 100                 | 24         | 57          | 2 (I)                                  | 1               | 1543.844                | 370-381          | 45.9             | 95                             |
|              |              |                  |                       |                                |                     |            |             |                                        |                 | 1618.747                | 382-395          |                  |                                |
| 7t           | serpin 1     | AAC47337.1       | I                     | 896                            | 100                 | 19         | 50          | 2 (I)                                  | 0               | 1543.853                | 370-381          |                  |                                |
|              |              |                  |                       |                                |                     |            |             |                                        |                 | 1618.741                | 382-395          |                  |                                |
| 8t           | serpin 1     | AAC47337.1       | I                     | 1,040                          | 100                 | 21         | 56          | 2 (I)                                  | 2               | 1543.965                | 370-381          | 54               | 95                             |
|              |              |                  |                       |                                |                     |            |             |                                        |                 | 1618.870                | 382-395          | 82.8             | 95                             |
| 9t           | serpin 1     | AAC47342.1       | A                     | 990                            | 100                 | 19         | 56          | 1 (A)                                  | 1               | 2341.136                | 337-358          | 172              | 95                             |
| 9t           | serpin 1     | AAC47338.1       | Z                     | 878                            | 100                 | 21         | 65          | 3 (Z)                                  | 0               | 2867.426                | 337-364          |                  |                                |
|              |              |                  |                       |                                |                     |            |             |                                        |                 | 1792.919                | 365-379          |                  |                                |
|              |              |                  |                       |                                |                     |            |             |                                        |                 | 1457.725                | 380-392          |                  |                                |
| 10t          | serpin 1     | AAC47338.1       | Z                     | 995                            | 100                 | 20         | 62          | 3 (Z)                                  | 2               | 2867.447                | 337-364          | 141              | 95                             |
|              |              |                  |                       |                                |                     |            |             |                                        |                 | 1792.927                | 365-379          | 74.6             | 95                             |
|              |              |                  |                       |                                |                     |            |             |                                        |                 | 1457.728                | 380-392          |                  |                                |
| 11t          | serpin 1     | AAC47334.1       | K                     | 1,090                          | 100                 | 23         | 64          | 3 (K)                                  | 2               | 1951.946                | 337-355          | 122              | 95                             |
|              |              |                  |                       |                                |                     |            |             |                                        |                 | 1385.723                | 356-366          |                  |                                |
|              |              |                  |                       |                                |                     |            |             |                                        |                 | 1468.822                | 367-378          | 57.5             | 95                             |
| 12t          | serpin 1     | AAC47342.1       | A                     | 1,170                          | 100                 | 21         | 60          | 4 (A)                                  | 3               | 2341.140                | 337-358          | 166              | 95                             |
|              |              |                  |                       |                                |                     |            |             |                                        |                 | 1627.940                | 366-378          | 32.5             | 95                             |
|              |              |                  |                       |                                |                     |            |             |                                        |                 | 1326.721                | 379-390          | 94.4             | 95                             |
|              |              |                  |                       |                                |                     |            |             |                                        |                 | 1397.760                | 379-391          |                  |                                |
| 12t          | serpin 1     | AAC47335.1       | E                     | 825                            | 100                 | 19         | 55          | 2 (E)                                  | 0               | 1068.698                | 361-369          |                  |                                |
|              |              |                  |                       |                                |                     |            |             |                                        |                 | 1973.994                | 337-355          |                  |                                |
| 13t          | serpin 1     | AAC47335.1       | E                     | 894                            | 100                 | 21         | 54          | 3 (E)                                  | 2               | 1974.137                | 337-355          | 164              | 95                             |
|              |              |                  |                       |                                |                     |            |             |                                        |                 | 1068.789                | 361-369          | 36.5             | 37.6                           |
|              |              |                  |                       |                                |                     |            |             |                                        |                 | 765.571                 | 363-369          |                  |                                |
| 14t          | serpin 1     | AAC47335.1       | E                     | 1,000                          | 100                 | 21         | 57          | 4 (E)                                  | 2               | 1974.144                | 337-355          | 180              | 95                             |
|              |              |                  |                       |                                |                     |            |             |                                        |                 | 1068.782                | 361-369          |                  |                                |
|              |              |                  |                       |                                |                     |            |             |                                        |                 | 765.569                 | 363-369          |                  |                                |
|              |              |                  |                       |                                |                     |            |             |                                        |                 | 1566.949                | 370-381          | 48.9             | 95                             |
| 16t          | serpin 1     | AAC47336.1       | ?                     | 706                            | 100                 | 22         | 47          | 1 (G)                                  | 0               | 1420.689                | 383-396          |                  |                                |
| 17t          | serpin 1     | AAC47335.1       | E                     | 933                            | 100                 | 22         | 54          | 2 (E)                                  | 0               | 1973.993                | 337-355          |                  |                                |
|              |              |                  |                       |                                |                     |            |             |                                        |                 | 1566.826                | 370-381          |                  |                                |
| 18t          | serpin 1     | AAA29336.1       | ?                     | 486                            | 100                 | 17         | 39          | 0                                      | 0               | n/a                     | n/a              |                  |                                |
| 19t          | serpin 1     | AAC47340.1       | J                     | 585                            | 100                 | 17         | 45          | 1 (J)                                  | 1               | 2422.181                | 337-359          | 45.7             | 95                             |
| 19t          | serpin 1     | AAC47342.1       | ?                     | 453                            | 100                 | 17         |             | 1 (A)                                  | 0               | 2341.144                | 337-358          |                  |                                |
| 20t          | serpin 1     | AAC47342.1       | ?                     | 676                            | 100                 | 19         | 48          | 1 (A)                                  | 0               | 2341.142                | 337-358          |                  |                                |
| 21t          | serpin 1     | P14754.1         | ?                     | 126                            | 100                 | 11         | 24          | 0                                      | 0               | n/a                     | n/a              |                  |                                |
| 22t          | serpin 1     | AAC47335.1       | ?                     | 263                            | 100                 | 19         | 42          | 1 (E)                                  | 0               | 1974.003                | 337-355          |                  |                                |
| 23t          | serpin 1     | AAC47335.1       | ?                     | 223                            | 100                 | 13         | 31          | 1 (E)                                  | 0               | 1973.987                | 337-355          |                  |                                |
| 24t          | serpin 1     | AAC47335.1       | E                     | 717                            | 100                 | 24         | 50          | 3 (E)                                  | 1               | 1973.996                | 337-355          | 50.6             | 95                             |
|              |              |                  |                       |                                |                     |            |             |                                        |                 | 1068.696                | 361-369          |                  |                                |
|              |              |                  |                       |                                |                     |            |             |                                        |                 | 765.512                 | 363-369          |                  |                                |
| 25t          | serpin 1     | AAC47335.1       | E                     | 540                            | 100                 | 23         | 50          | 3 (E)                                  | 1               | 1973.997                | 337-355          | 20.6             | 82.4                           |
|              |              |                  |                       |                                |                     |            |             |                                        |                 | 1068.695                | 361-369          |                  |                                |

|     |      |          |     |     |     |    |    |     |   |          |         |      |    |
|-----|------|----------|-----|-----|-----|----|----|-----|---|----------|---------|------|----|
| 26t | PPO1 | O44249.3 | n/a | 382 | 100 | 24 | 33 | n/a | 3 | 1566.830 | 370-381 | 65.7 | 95 |
|     |      |          |     |     |     |    |    |     |   | 1352.673 | 546-557 | 43.7 | 95 |
|     |      |          |     |     |     |    |    |     |   | 1516.767 | 408-419 | 32.1 | 95 |
| 26t | PPO2 | Q25519.3 | n/a | 118 | 100 | 16 | 24 | n/a |   | 783.4206 | 289-295 |      |    |
|     |      |          |     |     |     |    |    |     |   | n/a      | n/a     |      |    |

| LysC/ AspN Spot | Protein Name | Accession Number | Iso-form <sup>1</sup> | Results from the whole protein |                     |            |             | Isoform specific peptides |                 |                         |                  |                  |                                |
|-----------------|--------------|------------------|-----------------------|--------------------------------|---------------------|------------|-------------|---------------------------|-----------------|-------------------------|------------------|------------------|--------------------------------|
|                 |              |                  |                       | Mascot Protein Score           | Protein Score C.I.% | Pep. Count | % seq. cov. | Number by PMF (isoform)   | Number by MS/MS | MS/MS Observed mass(es) | Sequence covered | Mascot ion score | X! Tandem peptide ID prob. (%) |
| 2               | serpin 1     | 1K9O_I           | ?                     | 133                            | 100                 | 11         | 35          | 2(B)                      | 0               | 1107.584                | 365-374          |                  |                                |
|                 |              |                  |                       |                                |                     |            |             |                           |                 | 1214.620                | 356-364          |                  |                                |
| 2               | serpin 1     | AAC47333.1       |                       | 131                            | 100                 | 11         |             | 2 (F)                     |                 | 1183.683                | 373-381          |                  |                                |
|                 |              |                  |                       |                                |                     |            |             |                           |                 | 2875.441                | 373-397          |                  |                                |
| 3               | serpin 1     | AAC47332.1       | H                     | 120                            | 100                 | 14         | 41          | 3 (H)                     | 0               | 1412.795                | 371-381          |                  |                                |
|                 |              |                  |                       |                                |                     |            |             |                           |                 | 1566.885                | 384-396          |                  |                                |
|                 |              |                  |                       |                                |                     |            |             |                           |                 | 2475.286                | 362-381          |                  |                                |
| 3               | serpin 1     | AAC47337.1       |                       | 112                            | 99.997              | 13         | 39          | 2 (F)                     |                 | 1183.691                | 373-381          |                  |                                |
|                 |              |                  |                       |                                |                     |            |             |                           |                 | 2875.437                | 373-397          |                  |                                |
| 4               | serpin 1     | AAC47332.1       | H                     | 482                            | 100                 | 16         | 53          | 3 (H)                     | 2               | 1412.786                | 371-381          | 55.5             | 95                             |
|                 |              |                  |                       |                                |                     |            |             |                           |                 | 1566.856                | 384-396          | 81.8             | 95                             |
|                 |              |                  |                       |                                |                     |            |             |                           |                 | 2475.296                | 362-381          |                  |                                |
| 5               | serpin 1     | P14754.1         | B                     | 404                            | 100                 | 16         | 49          | 2 (B)                     | 1               | 1214.674                | 370-378          | 41.8             | 94                             |
|                 |              |                  |                       |                                |                     |            |             |                           |                 | 1091.599                | 379-388          |                  |                                |
|                 |              |                  |                       |                                |                     |            |             |                           |                 | 1107.593                | 379-388          |                  |                                |
| 5               | serpin 1     | AAC47333.1       | F                     | 380                            | 100                 | 16         | 50          | 2 (F)                     |                 | 1377.743                | 362-372          |                  |                                |
|                 |              |                  |                       |                                |                     |            |             |                           |                 | 1183.688                | 373-381          |                  |                                |
| 6               | serpin 1     | AAC47337.1       | ?                     | 272                            | 100                 | 13         | 53          | 1 (I)                     | 0               | 3143.615                | 370-395          |                  |                                |
| 7               | serpin 1     | AAC47333.1       | F                     | 405                            | 100                 | 18         | 51          | 2 (F)                     | 0               | 1183.679                | 373-381          |                  |                                |
|                 |              |                  |                       |                                |                     |            |             |                           |                 | 1694.944                | 382-397          |                  |                                |
|                 |              |                  |                       |                                |                     |            |             |                           |                 | 1726.879                | 382-397          |                  |                                |
| 7               | serpin 1     | AAC47337.1       | I                     | 394                            | 100                 | 16         | 51          | 1 (I)                     |                 | 3143.647                | 370-395          |                  |                                |
| 8               | serpin 1     | AAC47341.1       | D                     | 350                            | 100                 | 17         | 52          | 2 (D)                     | 0               | 1366.757                | 384-395          |                  |                                |
|                 |              |                  |                       |                                |                     |            |             |                           |                 | 1431.789                | 373-383          |                  |                                |
| 9               | serpin 1     | AAC47337.1       | ?                     | 200                            | 100                 | 17         | 56          | 1(I)                      | 0               | 3086.495                | 370-395          |                  |                                |
| 10              | serpin 1     | AAC47338.1       | Z                     | 414                            | 100                 | 14         | 43          | 2 (Z)                     | 1               | 1305.732                | 371-380          | 48.8             | 95                             |
|                 |              |                  |                       |                                |                     |            |             |                           |                 | 1086.577                | 383-392          |                  |                                |
| 11              | serpin 1     | AAC47334.1       | K                     | 278                            | 100                 | 14         | 44          | 2 (K)                     | 0               | 1385.760                | 356-366          |                  |                                |
|                 |              |                  |                       |                                |                     |            |             |                           |                 | 1658.795                | 379-392          |                  |                                |
|                 |              |                  |                       |                                |                     |            |             |                           |                 | 1674.790                | 379-392          |                  |                                |
| 12              | serpin 1     | AAC47333.1       |                       | 284                            | 100                 | 16         | 48          | 2 (F)                     | 0               | 2206.092                | 337-358          |                  |                                |
|                 |              |                  |                       |                                |                     |            |             |                           |                 | 2875.440                | 373-397          |                  |                                |
| 13              | serpin 1     | AAC47335.1       | E                     | 463                            | 100                 | 15         | 47          | 4 (E)                     | 1               | 2300.253                | 337-358          |                  |                                |
|                 |              |                  |                       |                                |                     |            |             |                           |                 | 1068.707                | 361-369          | 35.5             | 62.9                           |
|                 |              |                  |                       |                                |                     |            |             |                           |                 | 1566.876                | 370-381          |                  |                                |
|                 |              |                  |                       |                                |                     |            |             |                           |                 | 1183.659                | 373-381          |                  |                                |
| 14              | serpin 1     | AAC47335.1       | E                     | 517                            | 100                 | 17         | 49          | 5(E)                      | 3               | 2300.239                | 337-358          | 61.5             | 95                             |
|                 |              |                  |                       |                                |                     |            |             |                           |                 | 1068.707                | 361-369          | 37.1             | 73.6                           |
|                 |              |                  |                       |                                |                     |            |             |                           |                 | 1566.851                | 370-381          |                  |                                |
|                 |              |                  |                       |                                |                     |            |             |                           |                 | 1183.644                | 373-381          | 33.6             | 56.7                           |
|                 |              |                  |                       |                                |                     |            |             |                           |                 | 1368.716                | 373-383          |                  |                                |
| 18              | HP8          | AAV91006.1       | n/a                   |                                |                     |            |             |                           |                 | 1458.794                | 124-134          | 27.2             | 70                             |
| 19              | HP8          | AAV91006.1       | n/a                   | 81                             | 95.862              | 6          | 24          | n/a                       | 1               | 1458.794                | 124-134          | 51.6             | 95                             |
| 20              | HP8          | AAV91006.1       | n/a                   |                                |                     |            |             | n/a                       | 1               | 1458.789                | 124-134          | 56.3             | 95                             |

| Results from the whole protein |              |                  |                       |                      |                     |            |             | Isoform specific peptides |                 |                         |                  |                  |                                |
|--------------------------------|--------------|------------------|-----------------------|----------------------|---------------------|------------|-------------|---------------------------|-----------------|-------------------------|------------------|------------------|--------------------------------|
| GluC Bicarbonate Spot          | Protein Name | Accession Number | Iso-form <sup>1</sup> | Mascot Protein Score | Protein Score C.I.% | Pep. Count | % seq. cov. | Number by PMF (isoform)   | Number by MS/MS | MS/MS Observed mass(es) | Sequence covered | Mascot ion score | X! Tandem peptide ID prob. (%) |
| 2b                             | serpin 1     | AAC47340.1       | J                     | 159                  | 100                 | 9          | 25          | 1 (J)                     | 1               | 1526.845                | 385-397          | 79.8             | 95                             |
| 3b                             | serpin 1     | AAC47343.1       |                       | 107                  | 99.995              | 9          | 27          | 1 (B)                     | 0               | 1322.708                | 367-376          |                  |                                |
| 4b                             | serpin 1     | AAC47343.1       | B                     | 154                  | 100                 | 10         | 33          | 2 (B)                     | 0               | 1322.708                | 367-376          |                  |                                |
|                                |              |                  |                       |                      |                     |            |             |                           |                 | 1786.955                | 377-392          |                  |                                |
| 5b                             | serpin 1     | AAC47343.1       | B                     | 146                  | 100                 | 10         | 36          | 2 (B)                     | 1               | 1322.703                | 367-376          | 31.5             | 95                             |
|                                |              |                  |                       |                      |                     |            |             |                           |                 | 1771.059                | 377-392          |                  |                                |
|                                |              |                  |                       |                      |                     |            |             |                           |                 | 1786.969                | 377-392          |                  |                                |
| 5b                             | serpin 1     | AAC47337.1       | I                     | 109                  | 99.997              | 10         | 33          | 2 (I)                     | 0               | 948.530                 | 354-362          |                  |                                |
|                                |              |                  |                       |                      |                     |            |             |                           |                 | 1538.853                | 354-367          |                  |                                |
| 7b                             | serpin 1     | 1K9O_I           | ?                     | 124                  | 100                 | 8          | 23          | 0                         | 0               | n/a                     | n/a              |                  |                                |
| 8b                             | serpin 1     | 1K9O_I           | ?                     | 105                  | 99.993              | 7          | 18          | 0                         | 0               | n/a                     | n/a              |                  |                                |
| 9b                             | serpin 1     | 1K9O_I           | ?                     | 120                  | 100                 | 11         | 32          | 0                         | 0               | n/a                     | n/a              |                  |                                |
| 11b                            | serpin 1     | 1K9O_I           | ?                     | 88                   | 99.625              | 8          | 23          | 0                         | 0               | n/a                     | n/a              |                  |                                |
| 14b                            | serpin 1     | 1K9O_I           | ?                     | 116                  | 100                 | 10         | 31          | 0                         | 0               | n/a                     | n/a              |                  |                                |
| 19b                            | serpin 1     | 1SEK_A           | ?                     | 123                  | 100                 | 10         | 35          | 0                         | 0               | n/a                     | n/a              |                  |                                |
| 19b                            | HP8          | AAV91006.1       | n/a                   |                      |                     |            |             |                           | 1               | 1334.69                 | 260-271          | 43.6             | 95                             |

| Results from the whole protein |              |                  |                       |                      |                     |            |             | Isoform specific peptides |                 |                         |                  |                  |                                |
|--------------------------------|--------------|------------------|-----------------------|----------------------|---------------------|------------|-------------|---------------------------|-----------------|-------------------------|------------------|------------------|--------------------------------|
| GluC Phosphate Spot            | Protein Name | Accession Number | Iso-form <sup>1</sup> | Mascot Protein Score | Protein Score C.I.% | Pep. Count | % seq. cov. | Number by PMF (isoform)   | Number by MS/MS | MS/MS Observed mass(es) | Sequence covered | Mascot ion score | X! Tandem peptide ID prob. (%) |
| 4p                             | serpin 1     | AAC47332.1       | H                     | 142                  | 100                 | 15         | 44          | 2 (H)                     | 1               | 1692.987                | 385-398          |                  |                                |
|                                |              |                  |                       |                      |                     |            |             |                           |                 | 1859.991                | 370-384          | 33.5             | 95                             |
| 4p                             | serpin 1     | AAC47343.1       | B                     | 113                  | 99.999              | 14         | 40          | 1 (B)                     | 0               | 1322.705                | 367-376          |                  |                                |
| 5p                             | serpin 1     | AAC47343.1       | B                     | 82                   | 98.472              | 10         | 29          | 2 (B)                     | 1               | 1322.700                | 367-376          | 32.6             | 78                             |
|                                |              |                  |                       |                      |                     |            |             |                           |                 | 1771.046                | 377-392          |                  |                                |
|                                |              |                  |                       |                      |                     |            |             |                           |                 | 1786.985                | 377-392          |                  |                                |
| 7p                             | serpin 1     | AAC47336.1       | G                     | 115                  | 100                 | 13         | 38          | 1 (G)                     | 0               | 3024.661                | 371-396          |                  |                                |
| 8p                             | serpin 1     | AAC47337.1       | I                     | 201                  | 100                 | 14         | 42          | 2 (I)                     | 0               | 948.539                 | 354-362          |                  |                                |
|                                |              |                  |                       |                      |                     |            |             |                           |                 | 3384.889                | 368-395          |                  |                                |
| 11p                            | serpin 1     | AAC47334.1       | ?                     | 113                  | 99.999              | 12         | 35          | 1 (K)                     | 0               | 2358.320                | 348-368          |                  |                                |
| 12p                            | serpin 1     | AAC47342.1       | ?                     | 219                  | 100                 | 11         | 24          | 0                         | 0               | n/a                     | n/a              |                  |                                |
| 13p                            | serpin 1     | AAC47342.1       | ?                     | 201                  | 100                 | 14         | 40          | 0                         | 0               | n/a                     | n/a              |                  |                                |
| 14p                            | serpin 1     | AAC47339.1       | ?                     | 150                  | 100                 | 14         | 36          | 2 (C)                     | 0               | 1137.639                | 348-358          |                  |                                |
|                                |              |                  |                       |                      |                     |            |             |                           |                 | 1488.709                | 359-371          |                  |                                |

<sup>1</sup>Isoform identification based on the presence of at least two isoform specific peptides by PMF or at least one isoform specific peptide confirmed by MS/MS with an X!Tandem peptide identification probability of 95%

Figure S1

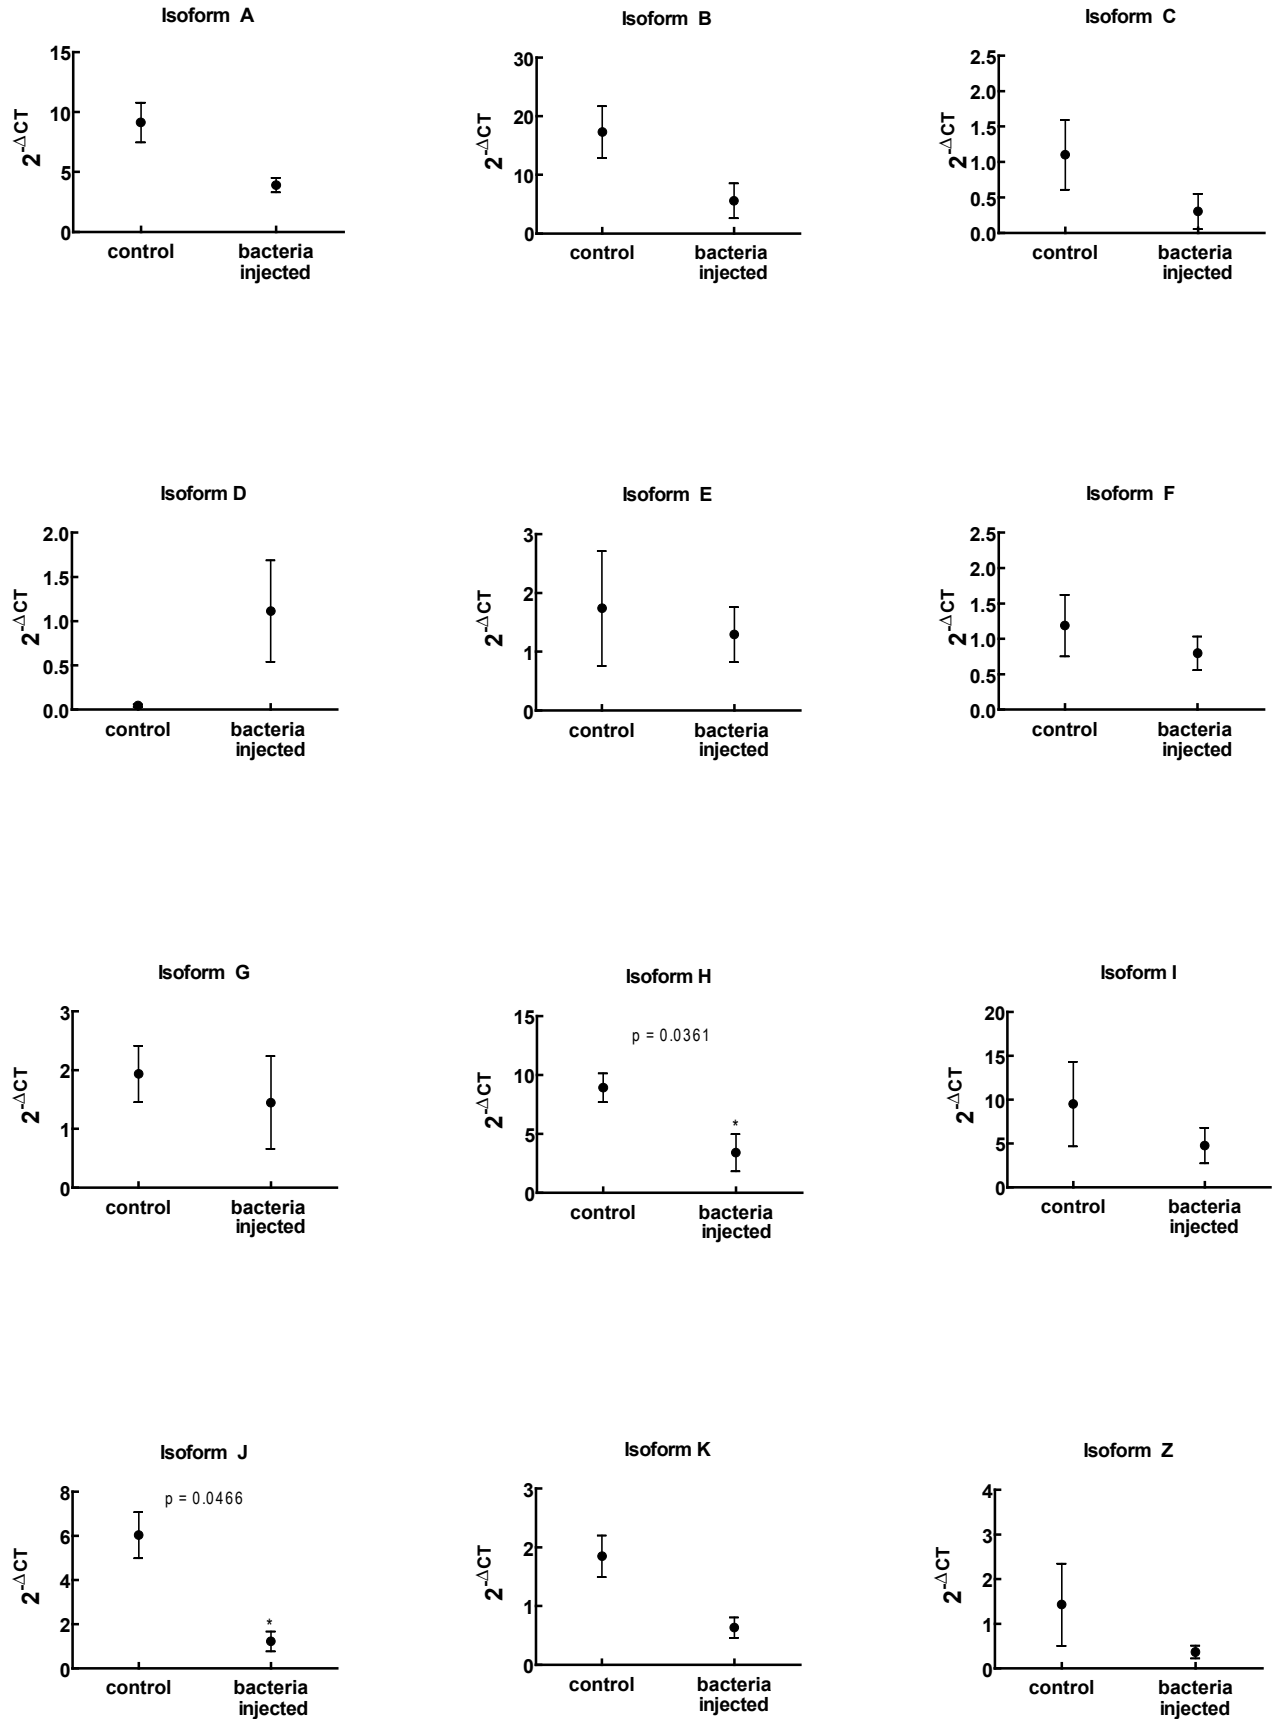

Figure S2

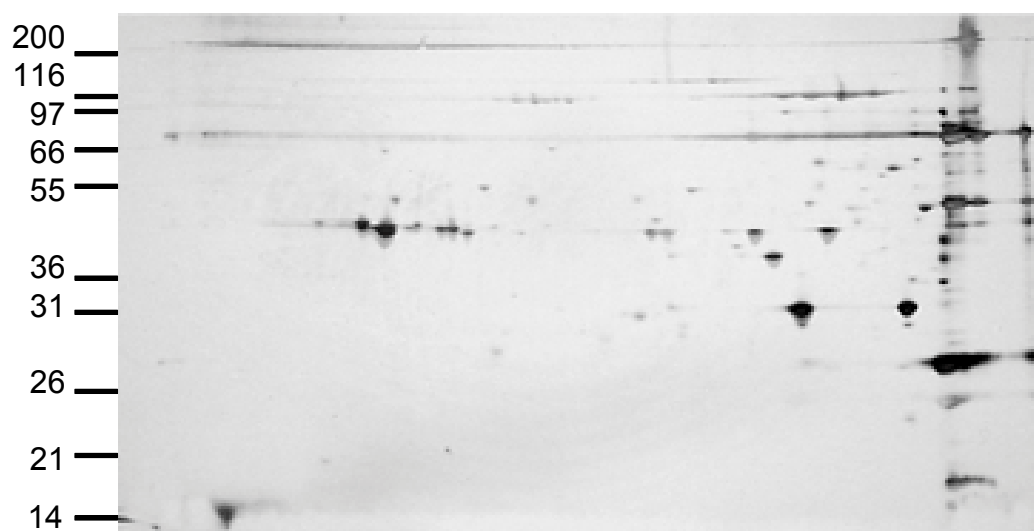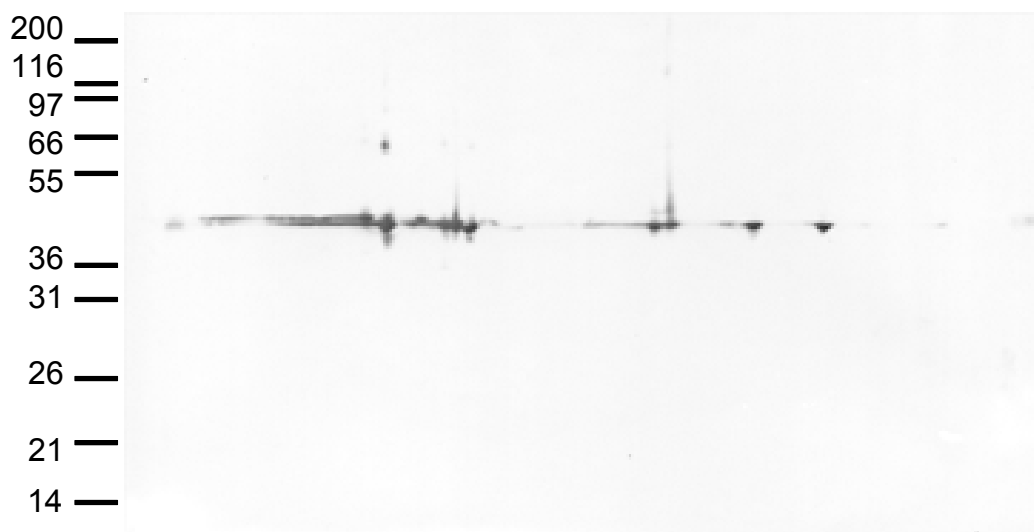

Figure S3

A.

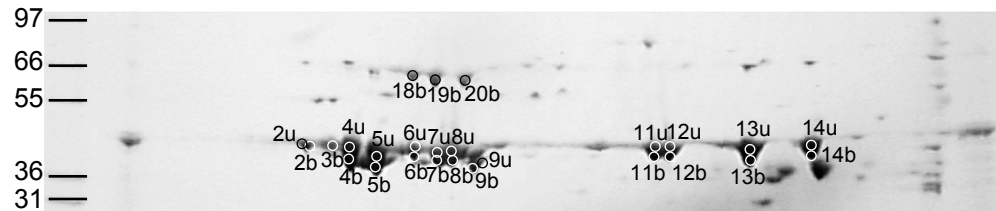

B.

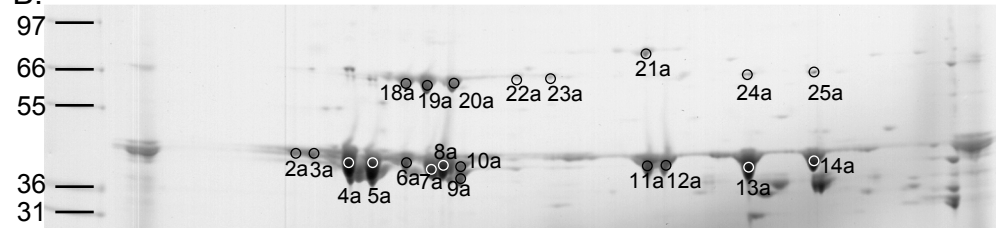



Figure S4

2\_trypsin Serpin-1J peptide 1

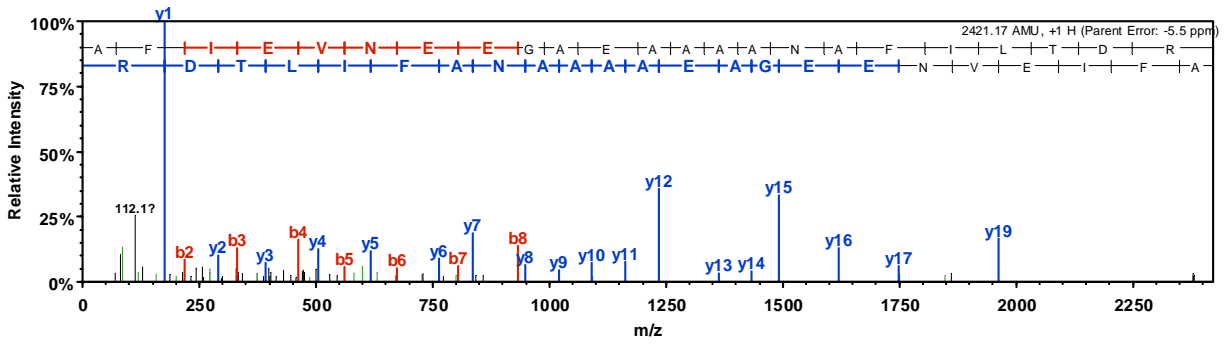

2\_trypsin Serpin-1J peptide 2

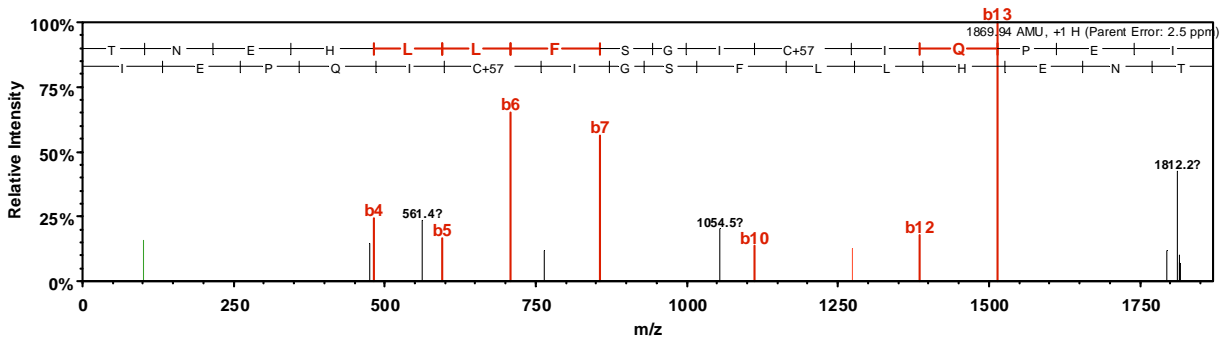

4\_trypsin Serpin-1H

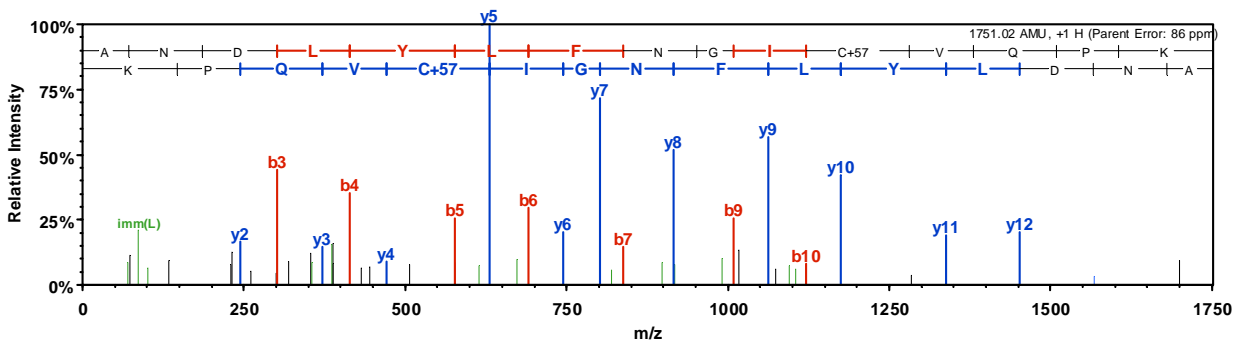

6\_trypsin Serpin-1I

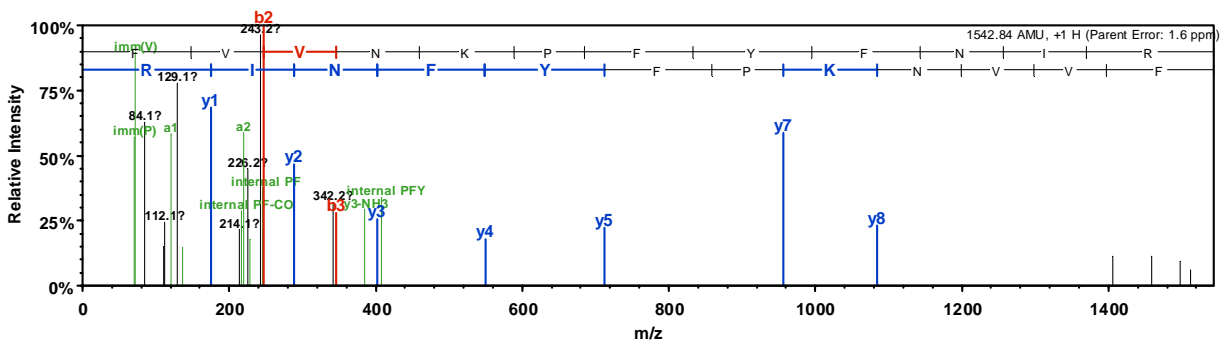

### 8\_trypsin Serpin-11

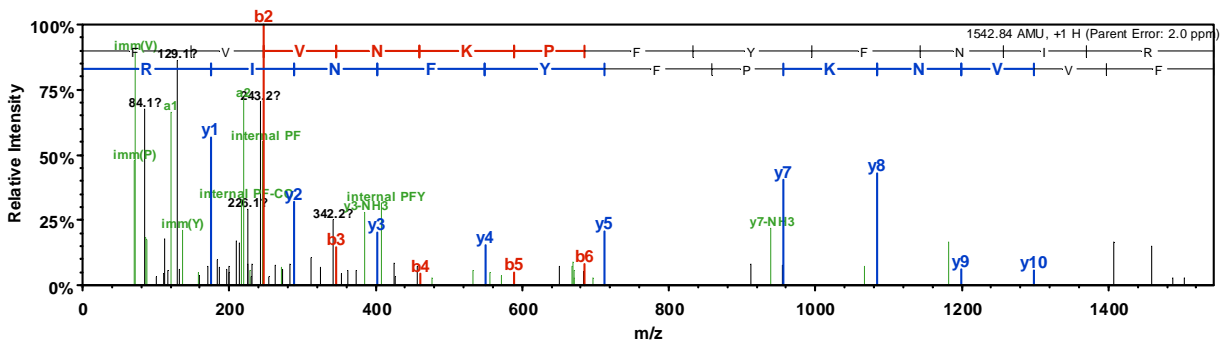

### 9\_trypsin Serpin-1A

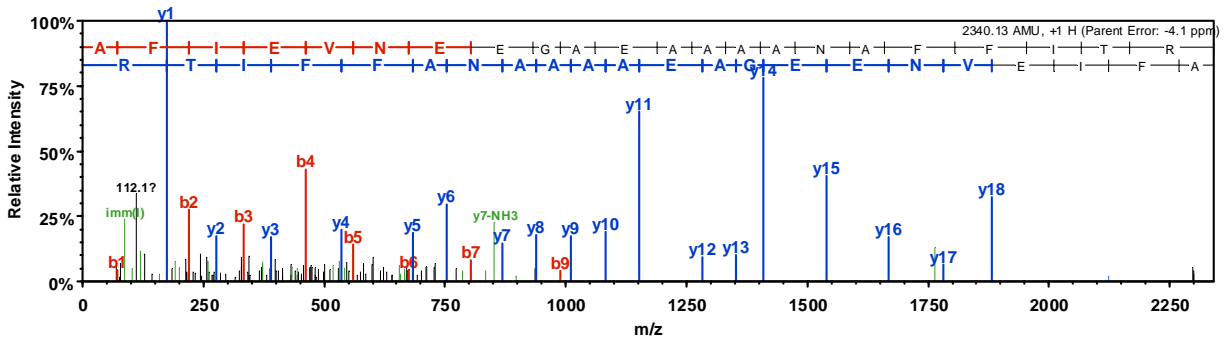

### 10\_trypsin Serpin-1Z peptide 1

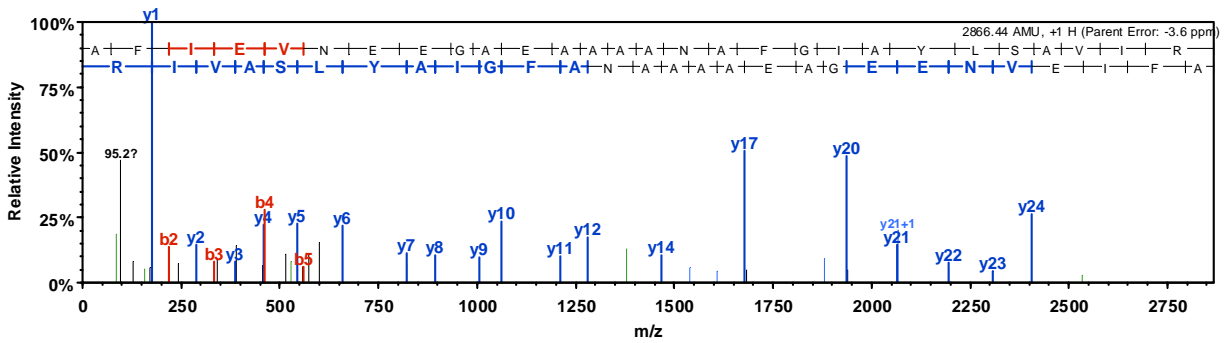

### 10\_trypsin Serpin-1Z peptide 2

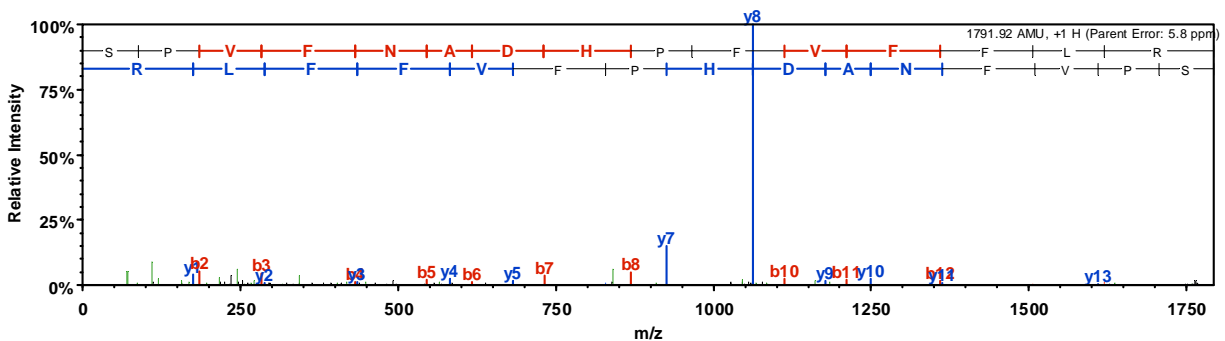

### 11\_trypsin Serpin-1K peptide 1

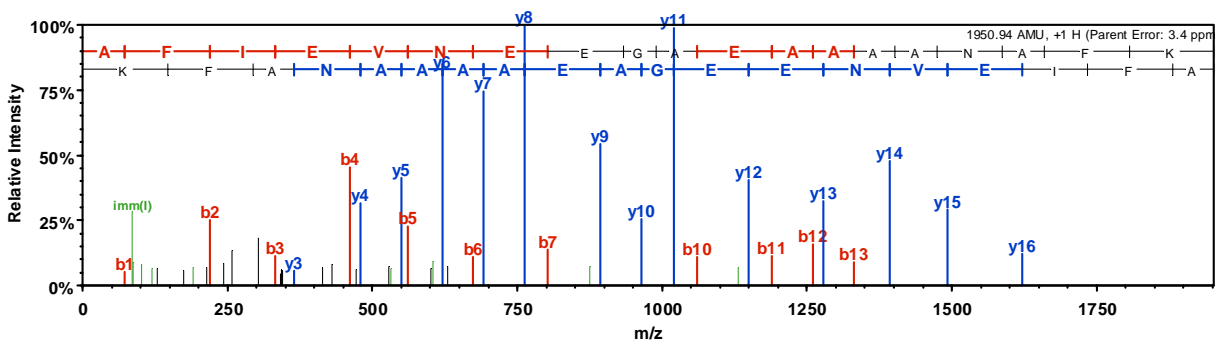

### 11\_trypsin Serpin-1K peptide 2

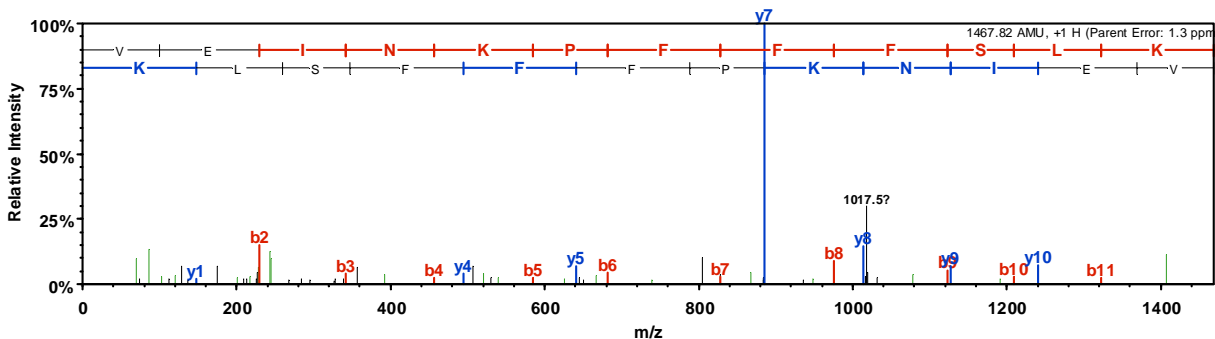

### 12\_trypsin Serpin-1A peptide 1

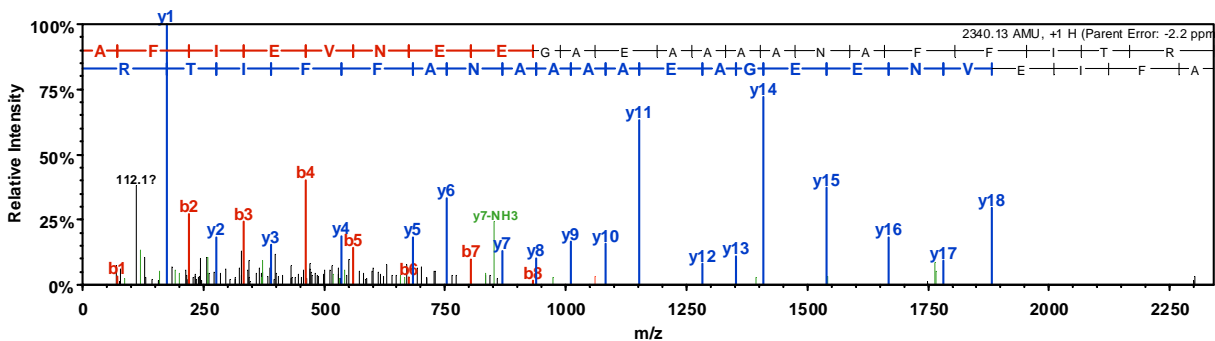

### 12\_trypsin Serpin-1A peptide 2

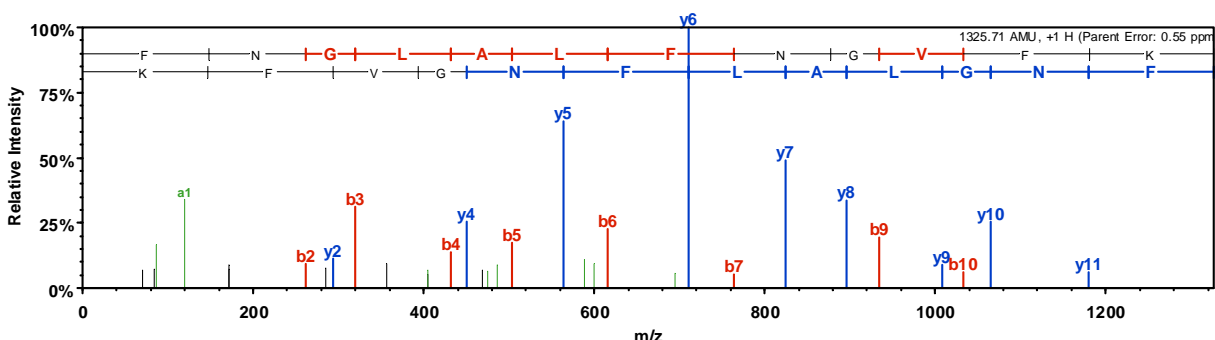

### 12\_trypsin Serpin-1A peptide 3

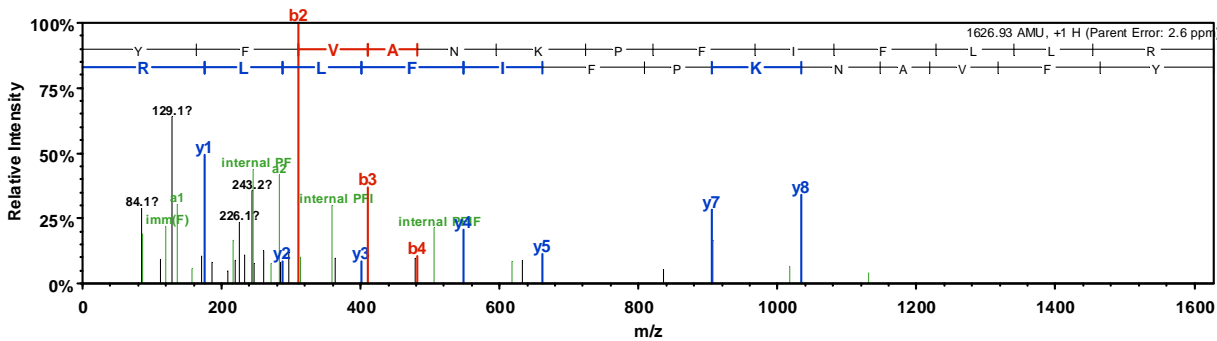

### 13\_trypsin Serpin-1E

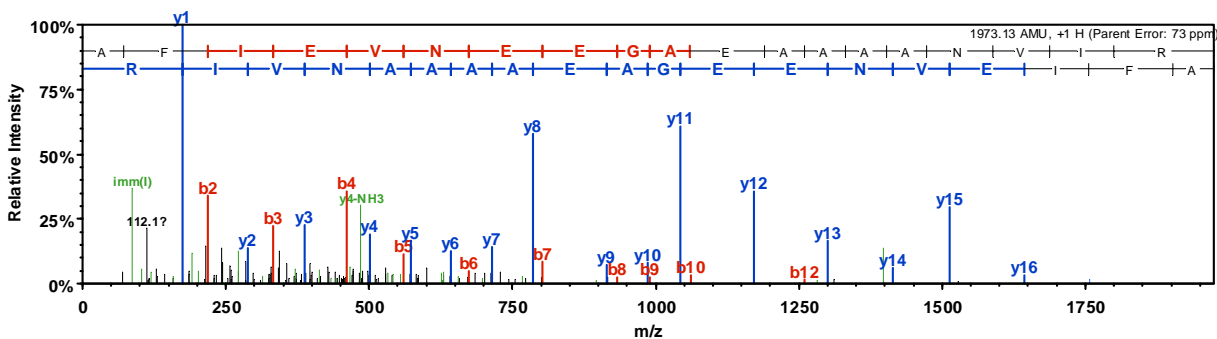

### 14\_trypsin Serpin-1E peptide 1

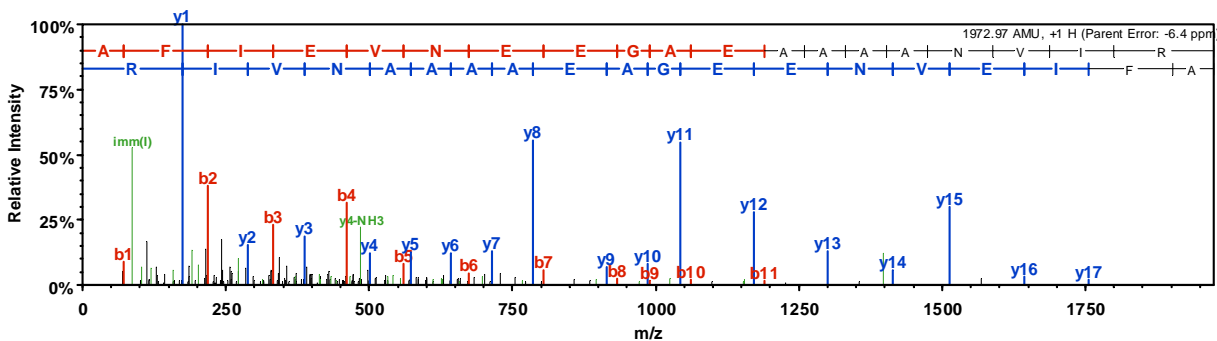

### 14\_trypsin Serpin-1E peptide 2

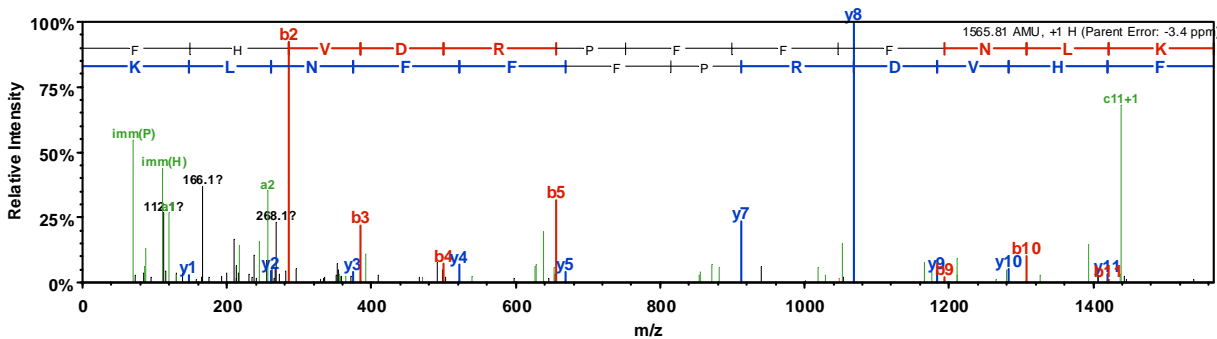

19\_trypsin Serpin1J

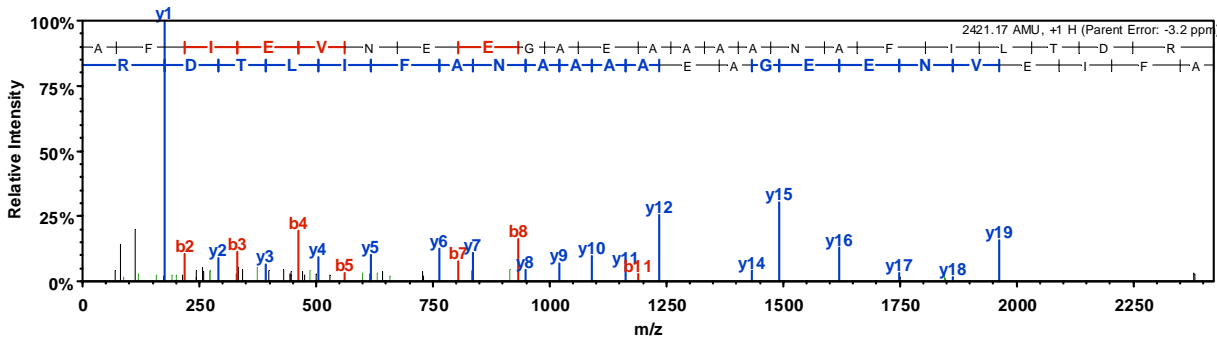

24\_trypsin Serpin-1E

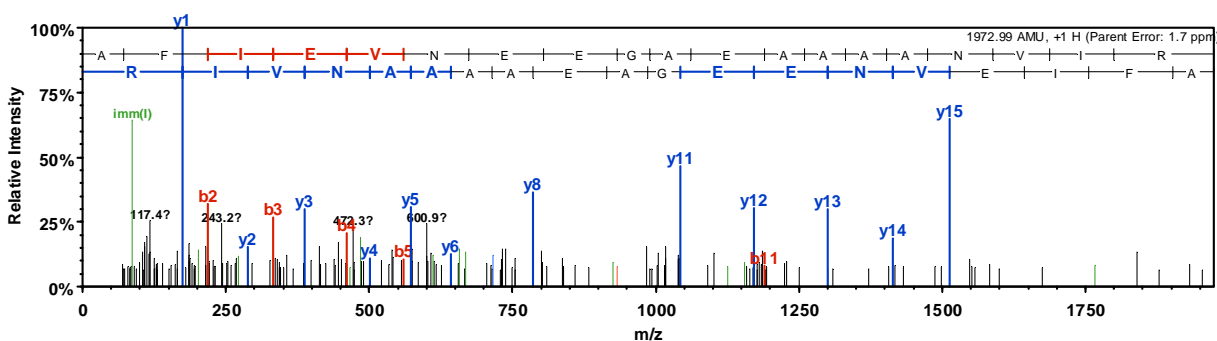

25\_trypsin Serpin-1E

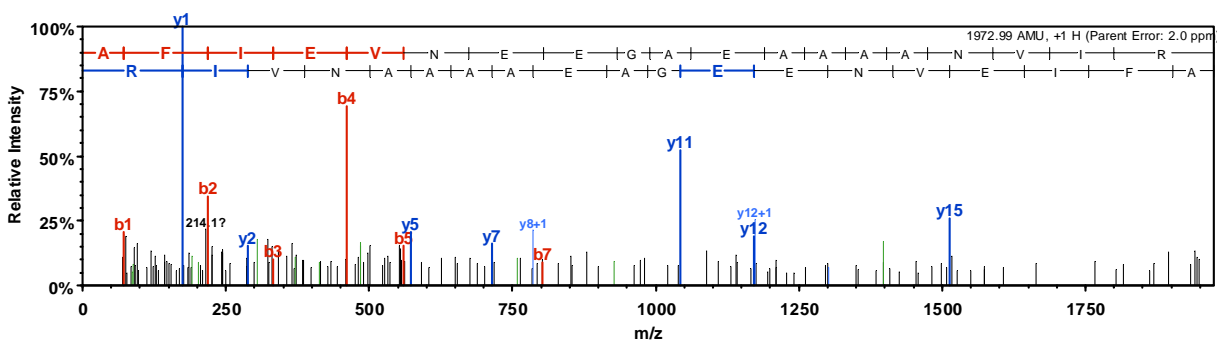

26\_trypsin Prophenoloxidase-1 peptide 1

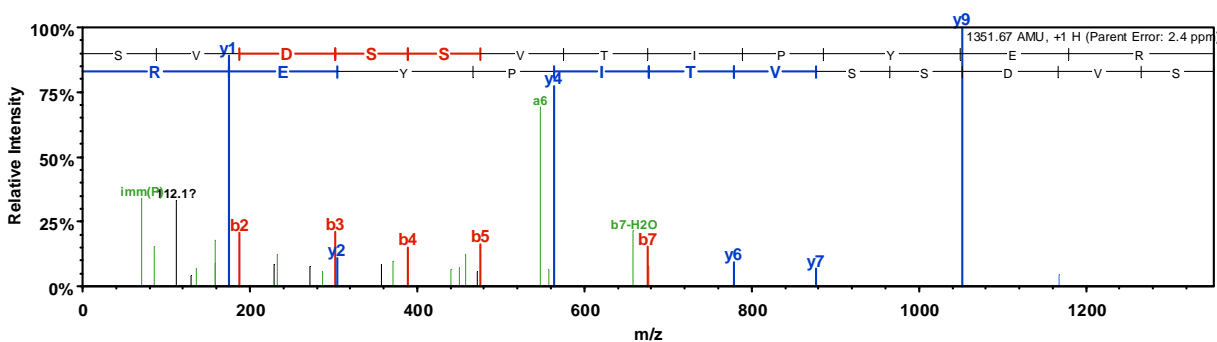

26\_trypsin Prophenoloxidase-1 peptide 2

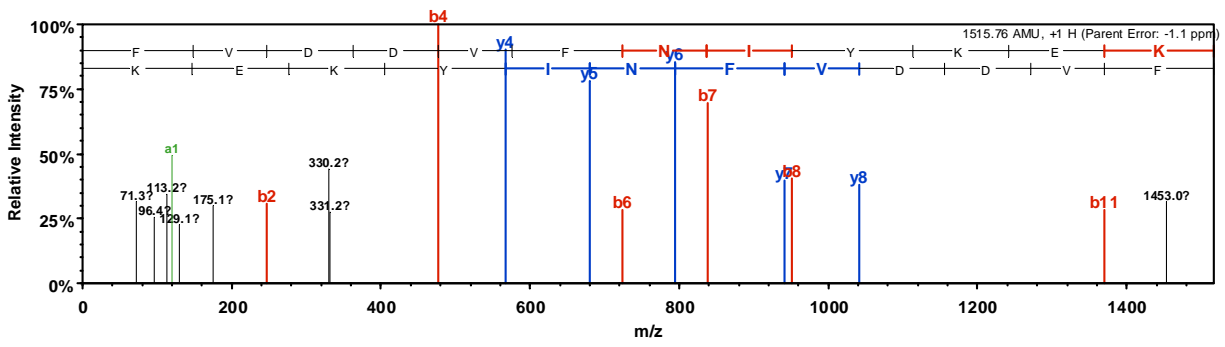

26\_trypsin Prophenoloxidase-1 peptide 3

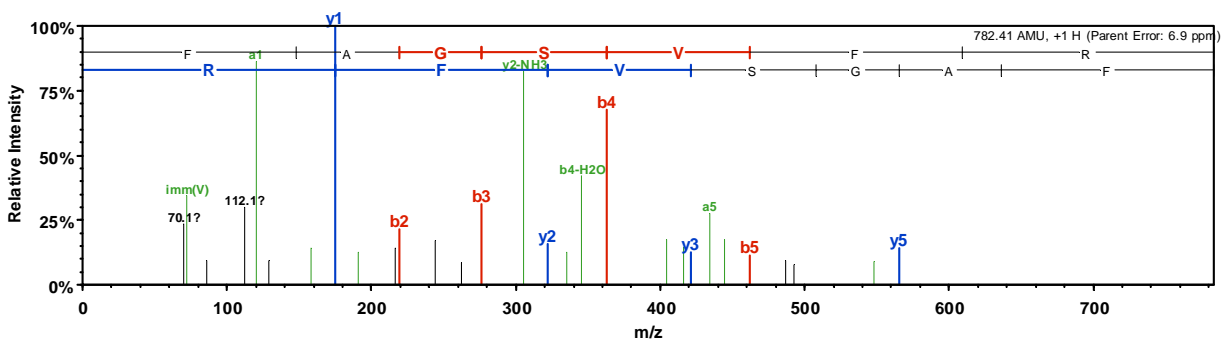

4\_LysC/AspN Serpin-1H peptide 1

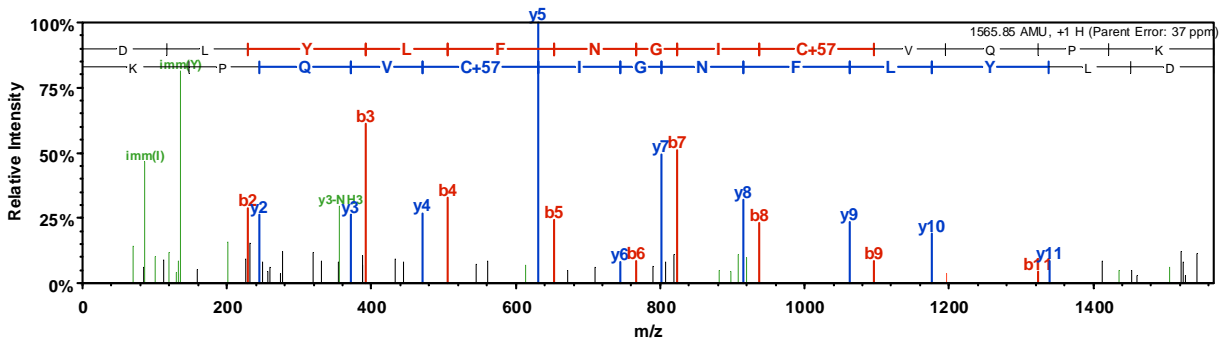

4\_LysC/AspN Serpin-1H peptide 2

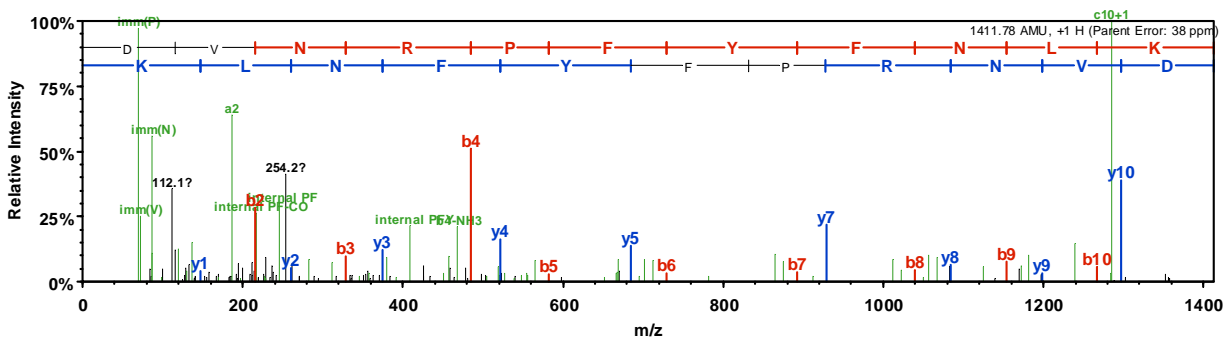

5\_ LysC/AspN Serpin-1B

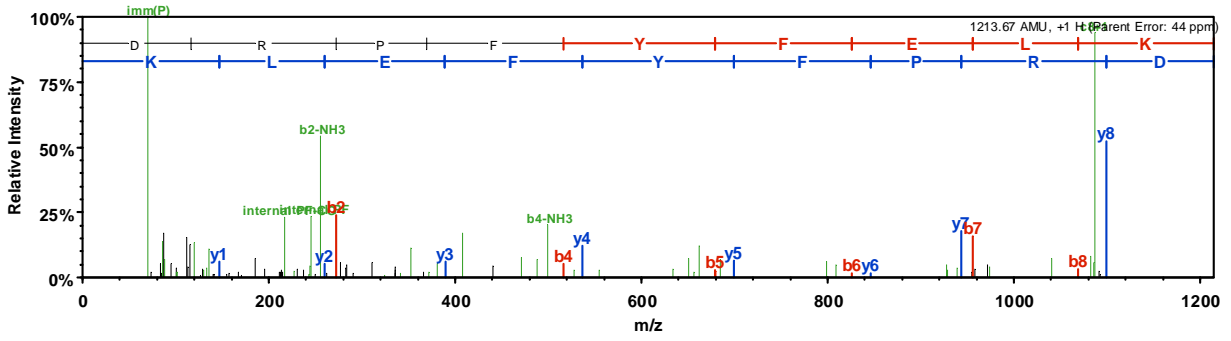

10\_ LysC/AspN Serpin-1Z

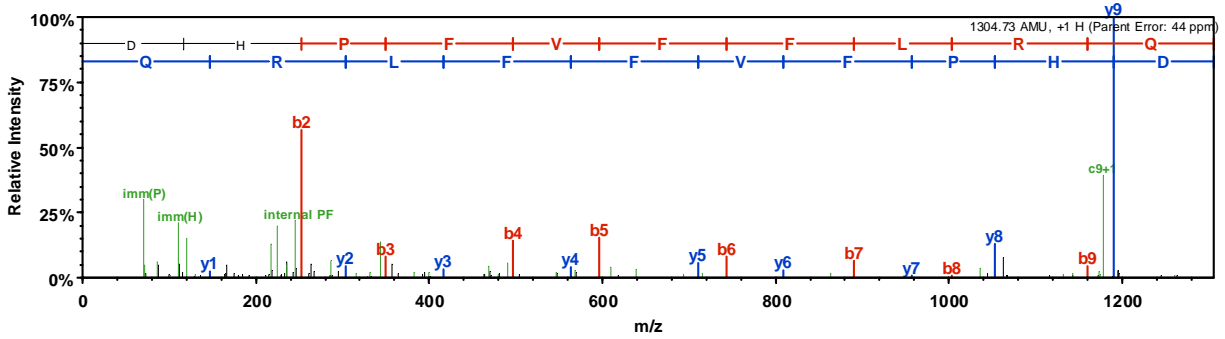

13\_ LysC/AspN Serpin-1E

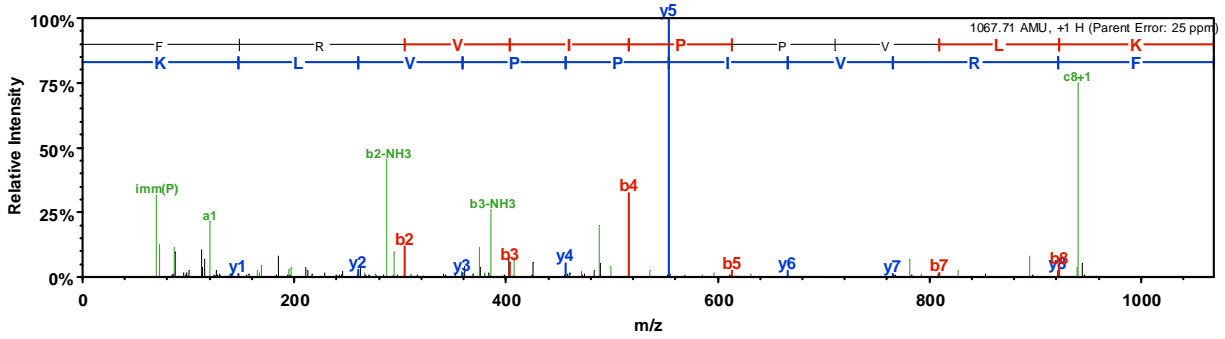

14\_ LysC/AspN Serpin-1E peptide 1

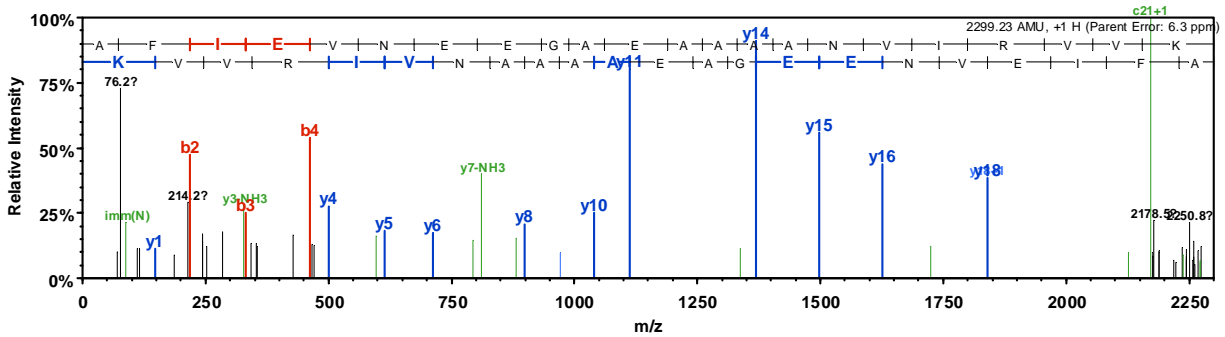

14\_ LysC/AspN Serpin-1E peptide 2

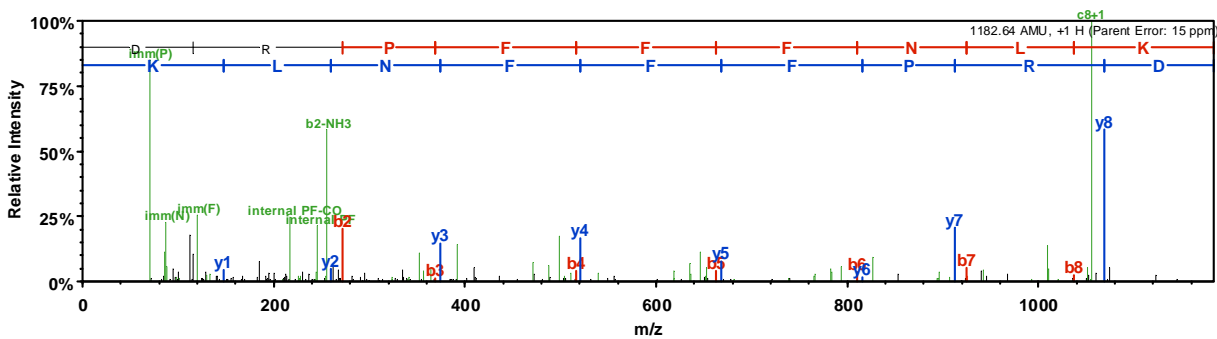

14\_ LysC/AspN Serpin-1E peptide 3

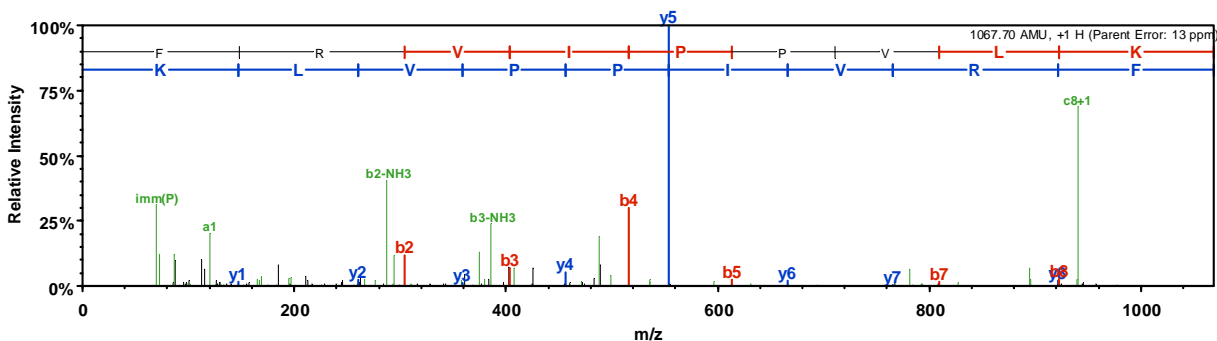

18\_ LysC/AspN HP 8

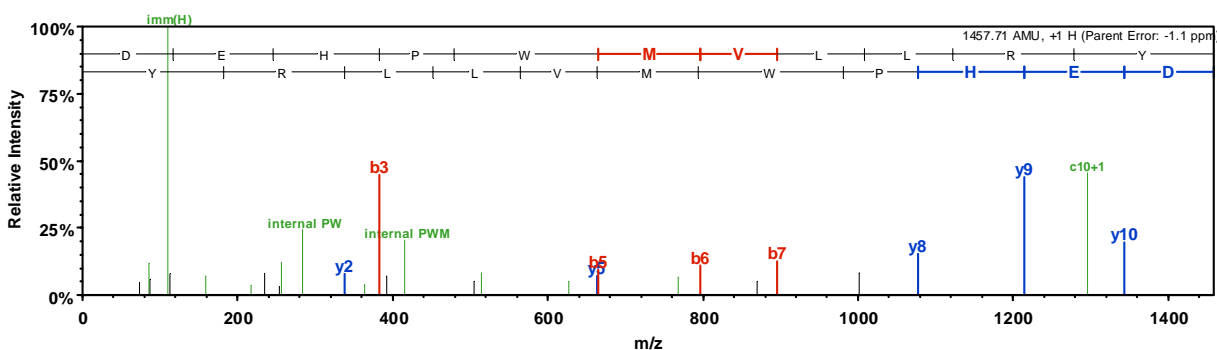

19\_ LysC/AspN HP 8

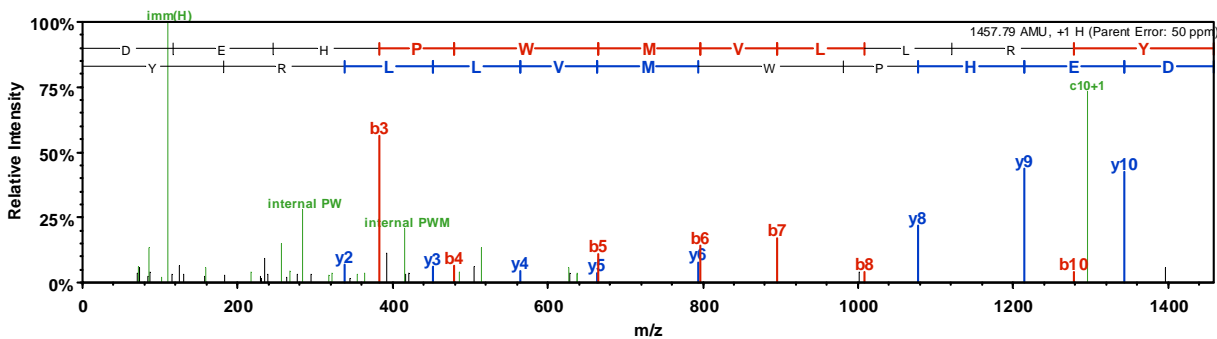



20\_ LysC/AspN C HP 8

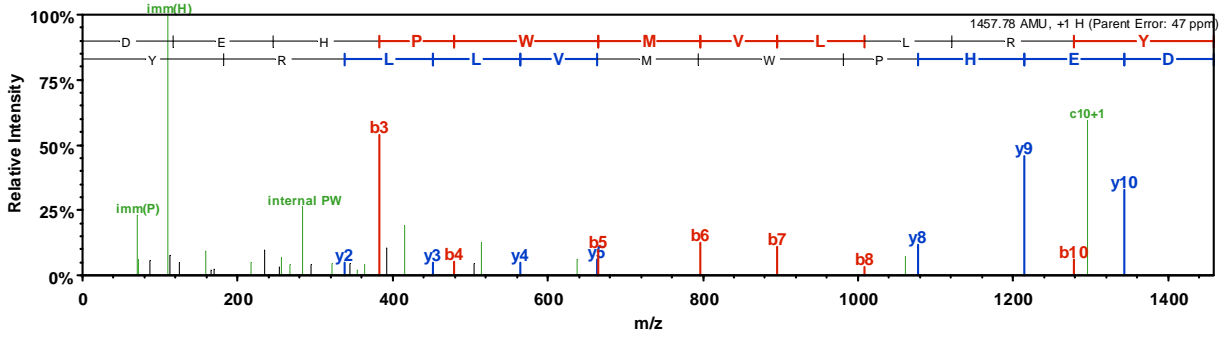

2b\_ Glu-C Serpin-1J

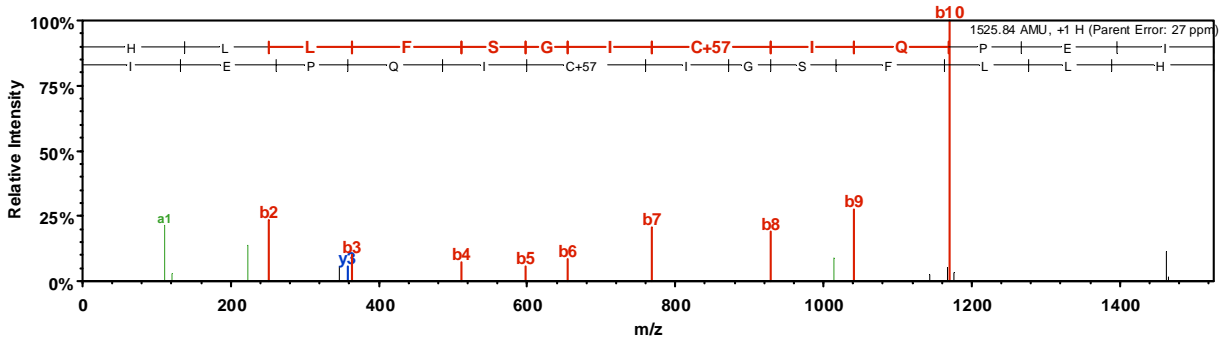

5b\_ Glu-C Serpin-1B

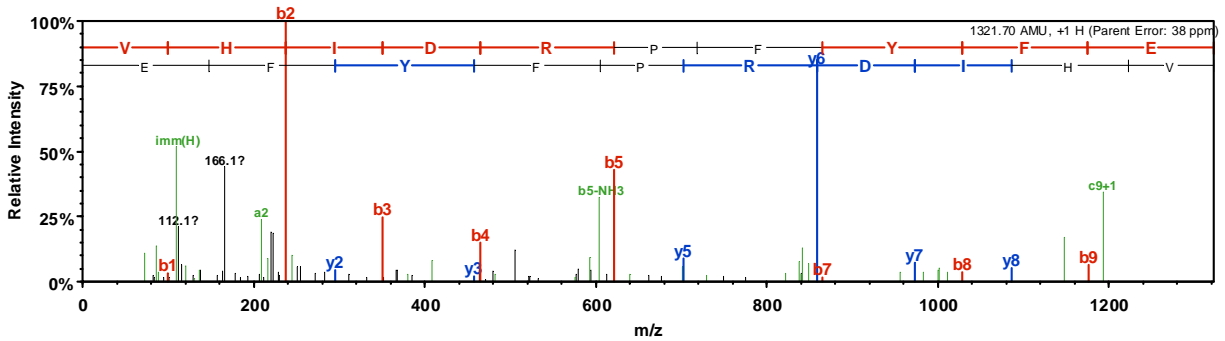

19b\_ Glu-C HP8

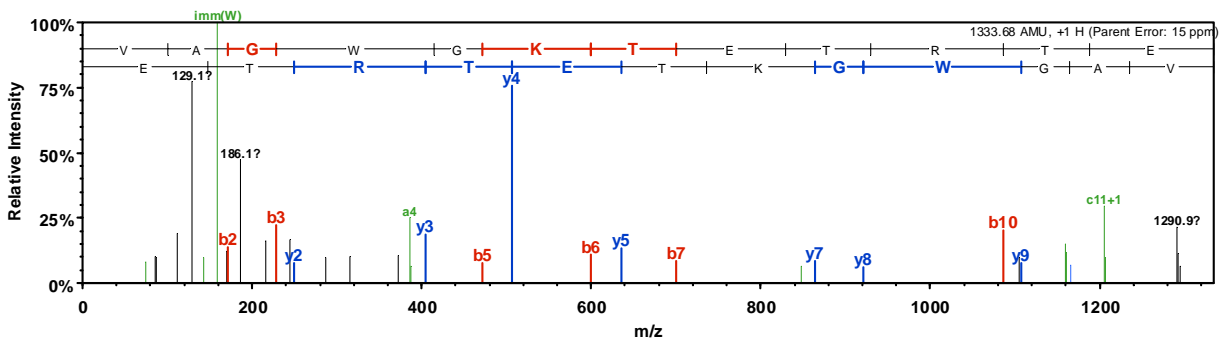

### 4p\_Glu-C Serpin-1H

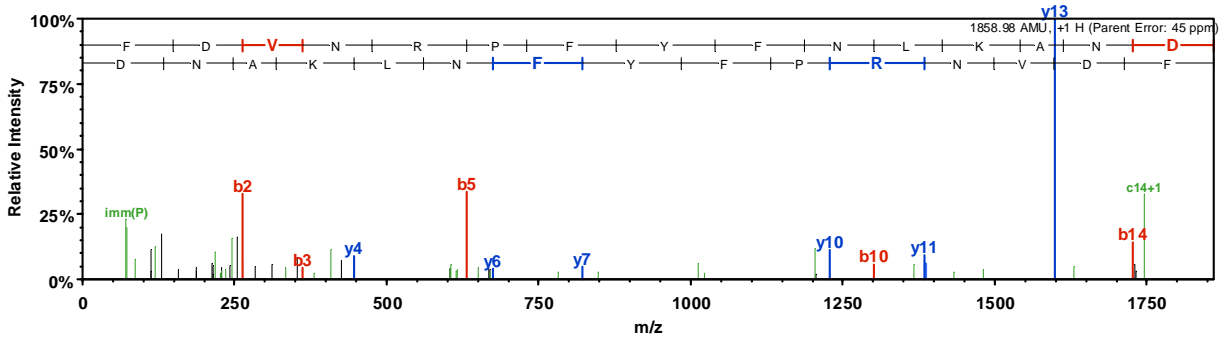

### 5p\_GluC Serpin-1B

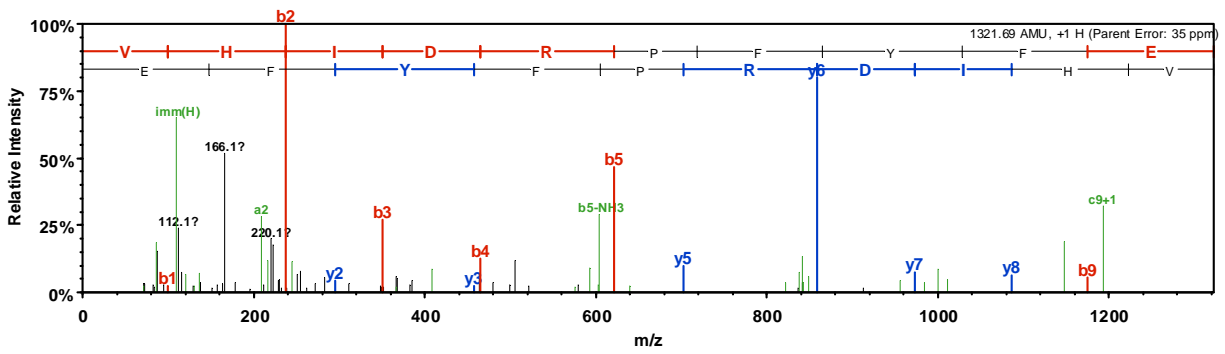

Figure S5

A. Serpin-1B antibody

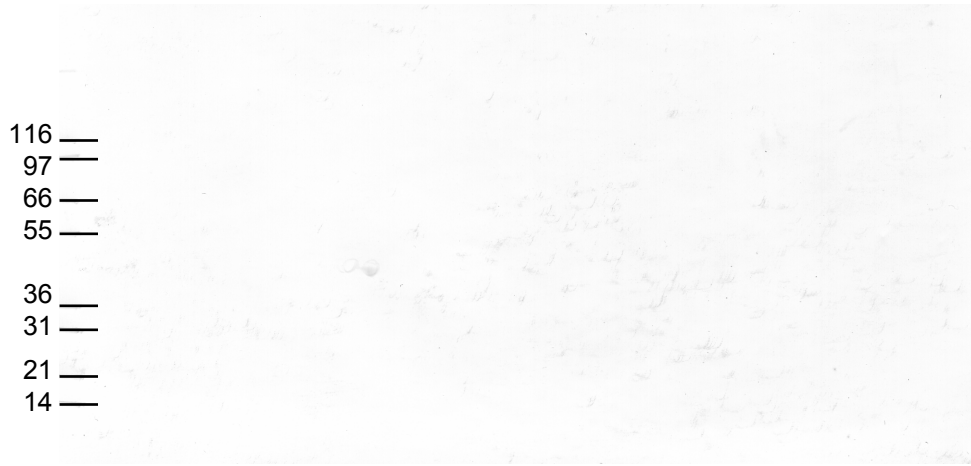

B. Serpin-1F antibody

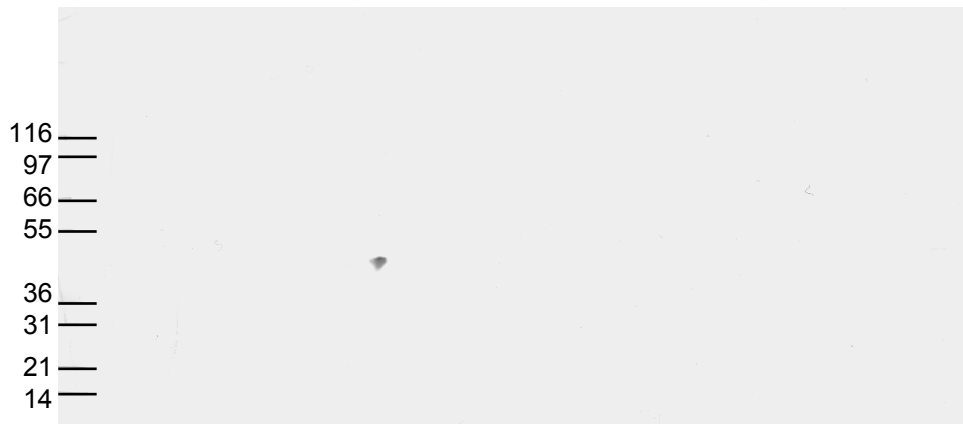

Figure S6

A. Spot 13

MS - DEFAULT CALIBRATION

Plate: 1 Spot: C10

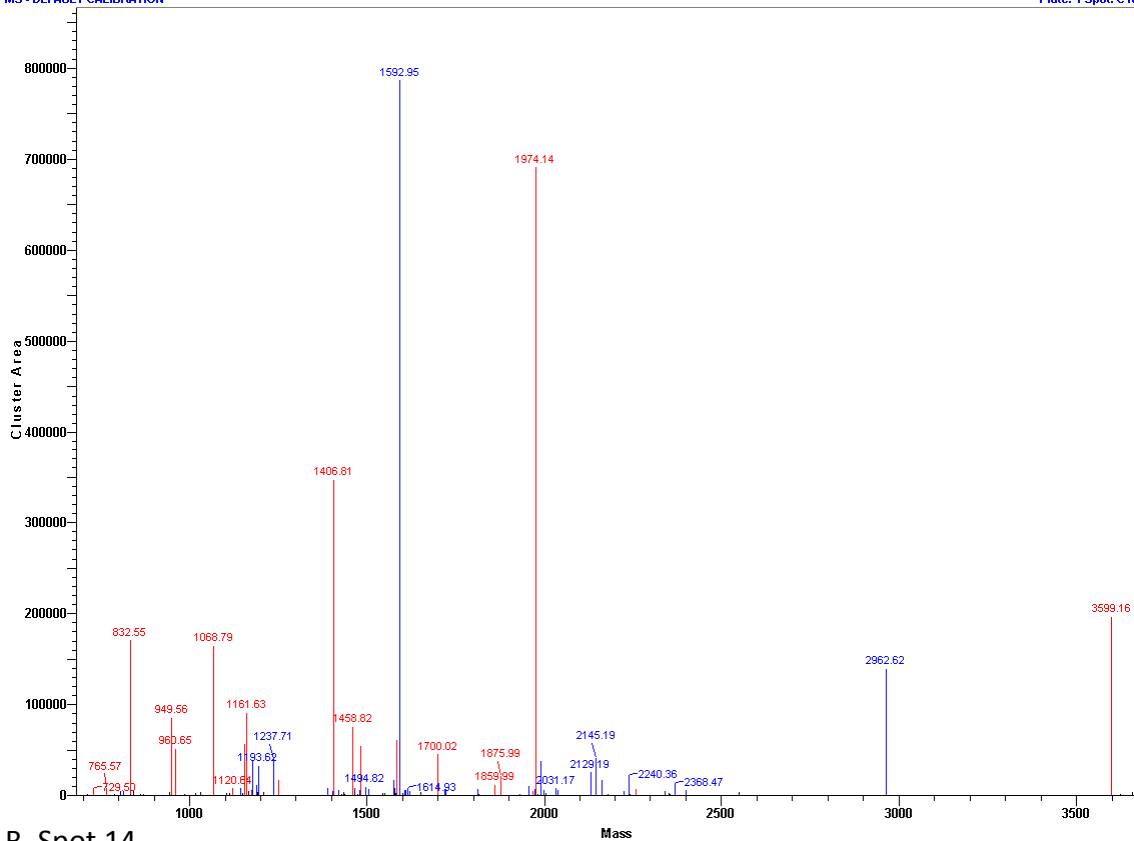

B. Spot 14

MS - DEFAULT CALIBRATION

Plate: 1 Spot: C11

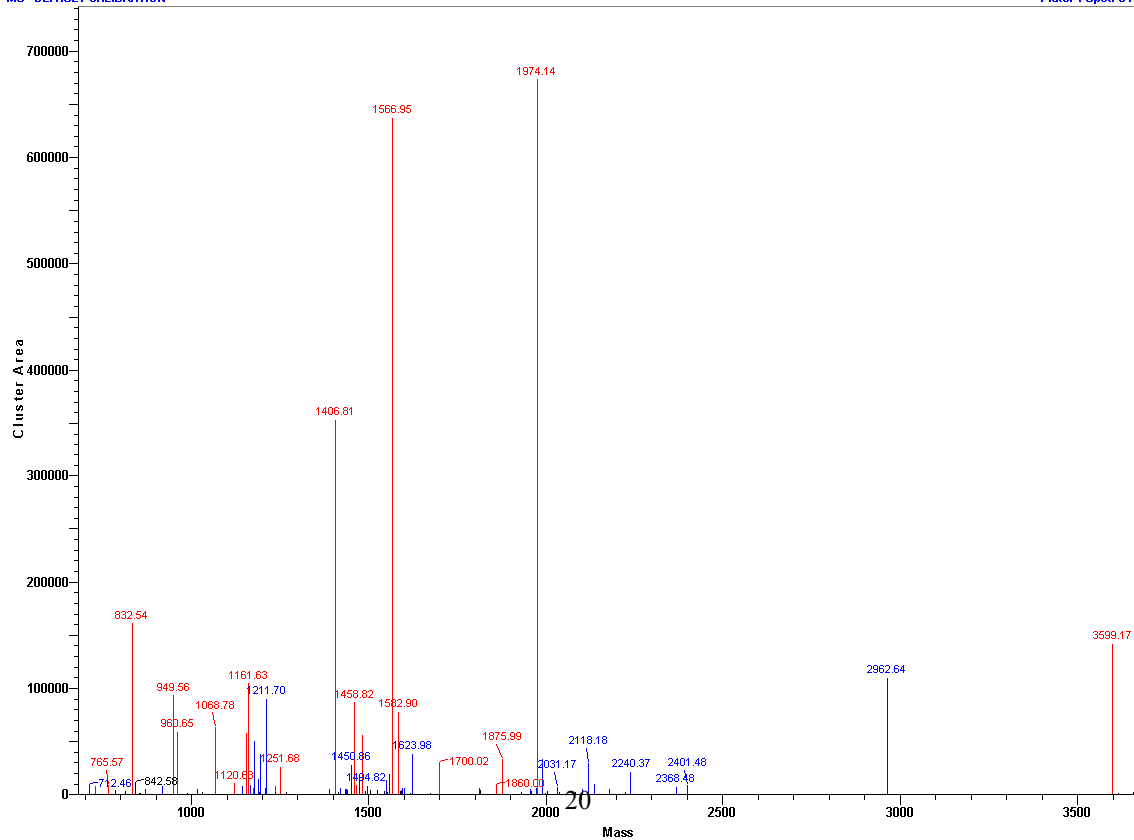

Figure S7

A.

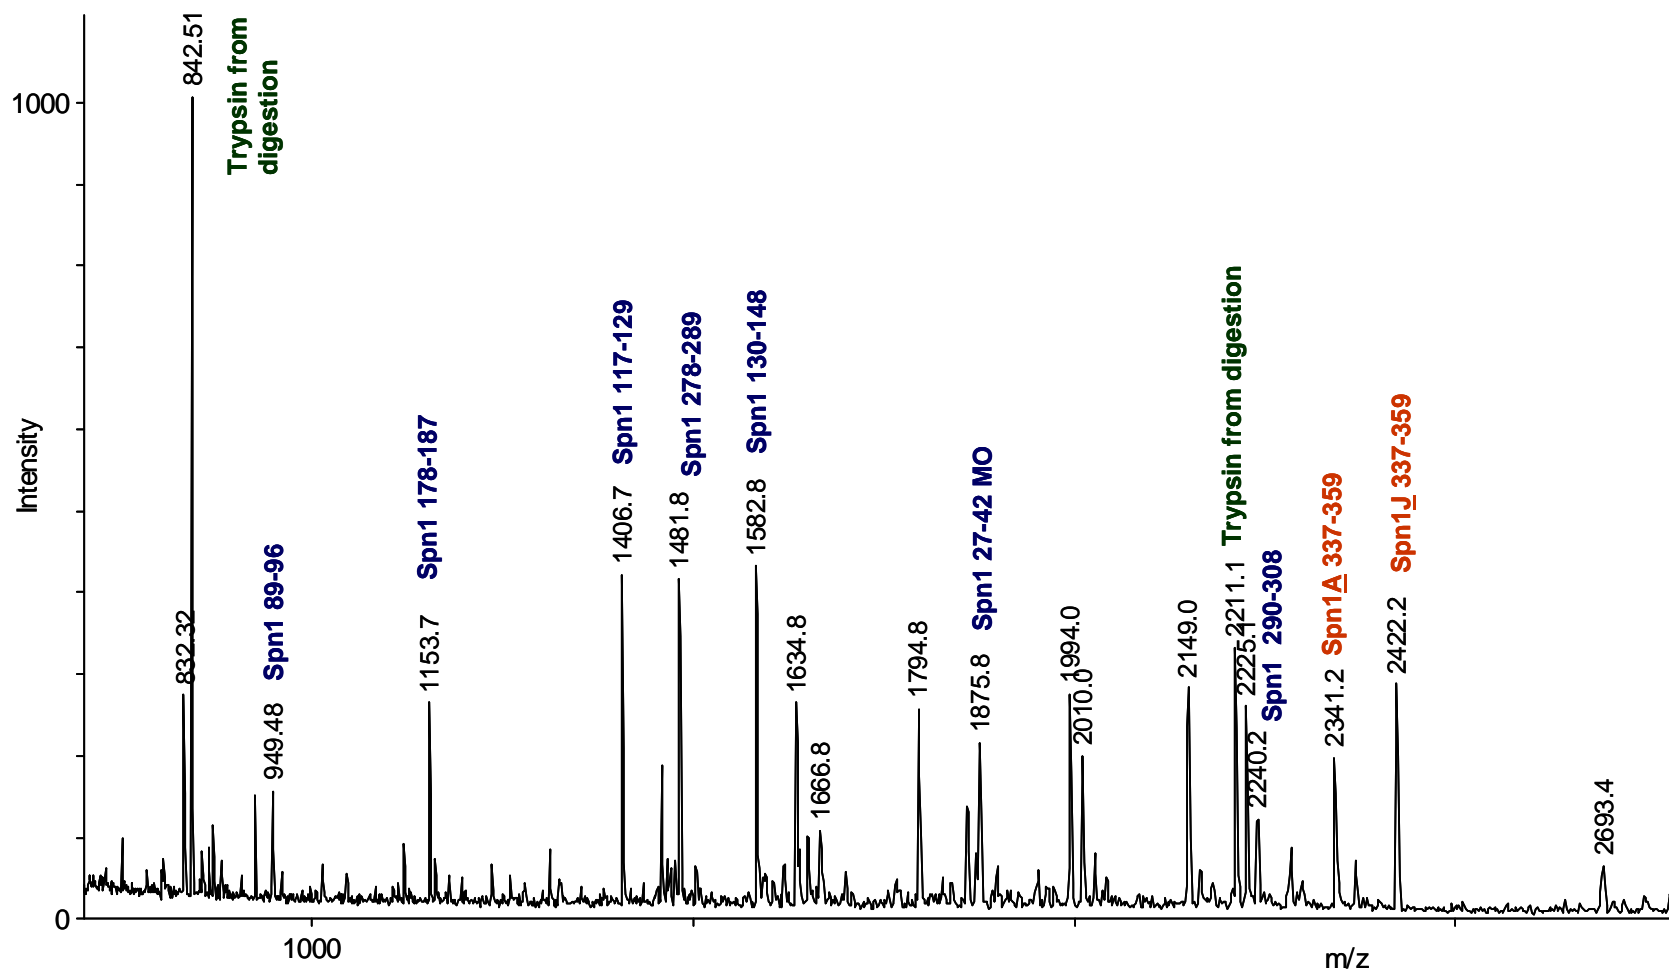

**B**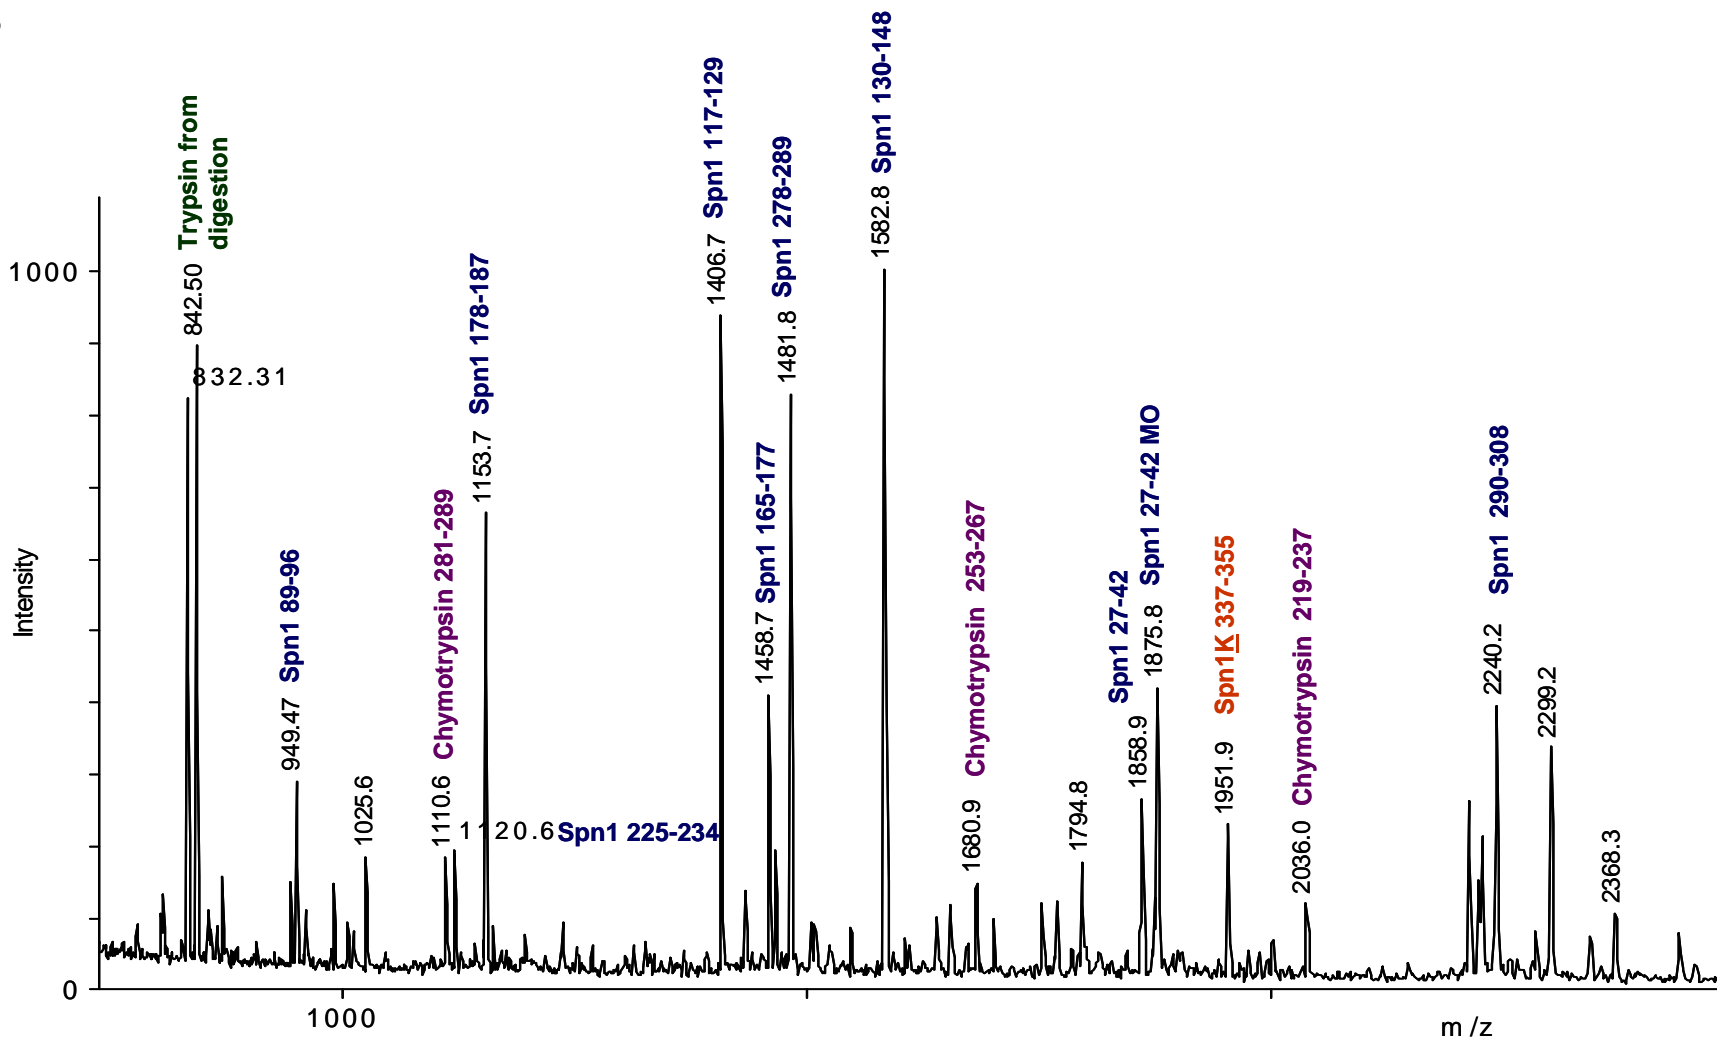

Supplement: supp_M110.125419_jbc.M110.125419-1.pdf [file supp_M110.125419_jbc.M110.125419-1.pdf]
